# Supplementary material for: Concurrent Activation of Both Survival-Promoting and Death-Inducing Signaling by Chloroquine in Glioblastoma Stem Cells: Implications for Potential Risks and Benefits of Using Chloroquine as Radiosensitizer
Source: MDPI journal article supplement (doi:10.3390/cells12091290), 2023-04-30
Supplement: s1 [file s1]

**a**

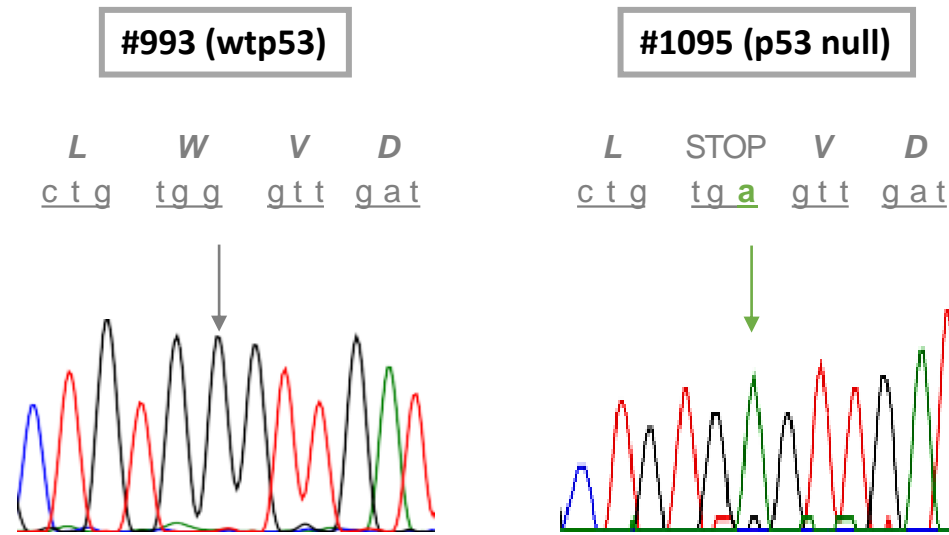

**b**

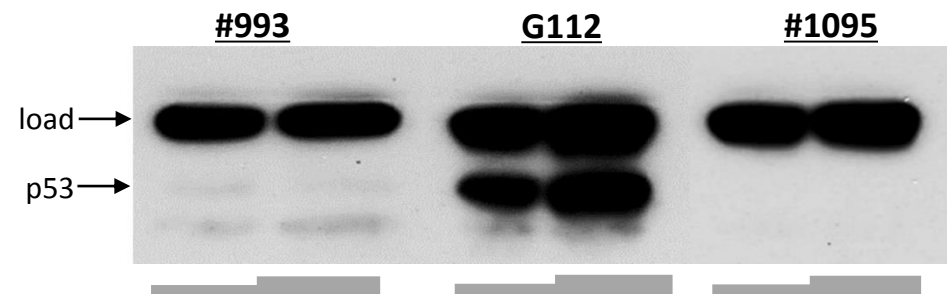

**Figure S1**

**C**

**#993 (wtp53)**

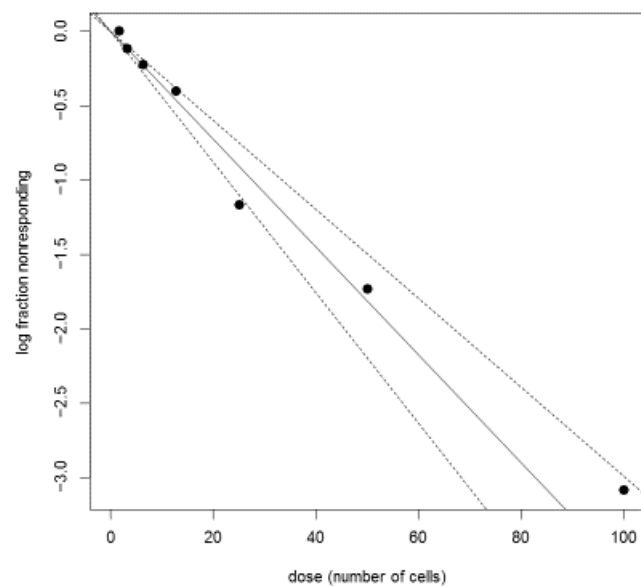

| Group | Lower | Estimate | Upper |
|-------|-------|----------|-------|
| #993  | 33.4  | 27.6     | 22.8  |

**G112 (R273H-p53)**

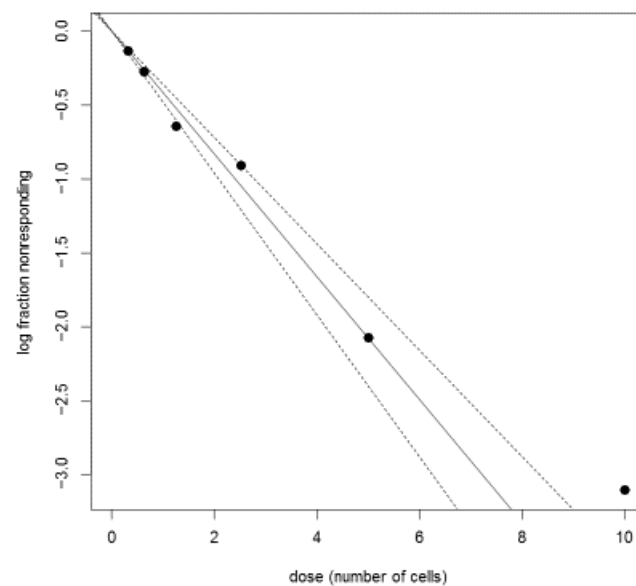

| Group  | Lower | Estimate | Upper |
|--------|-------|----------|-------|
| G112SP | 2.78  | 2.41     | 2.08  |

**#1095 (p53 null)**

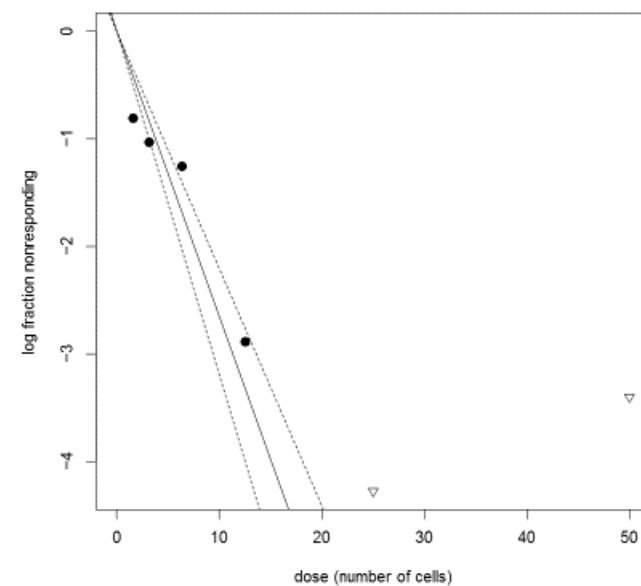

| Group | Lower | Estimate | Upper |
|-------|-------|----------|-------|
| #1095 | 4.53  | 3.77     | 3.13  |

**Figure S1**



**d**

**#993 (wtp53)**

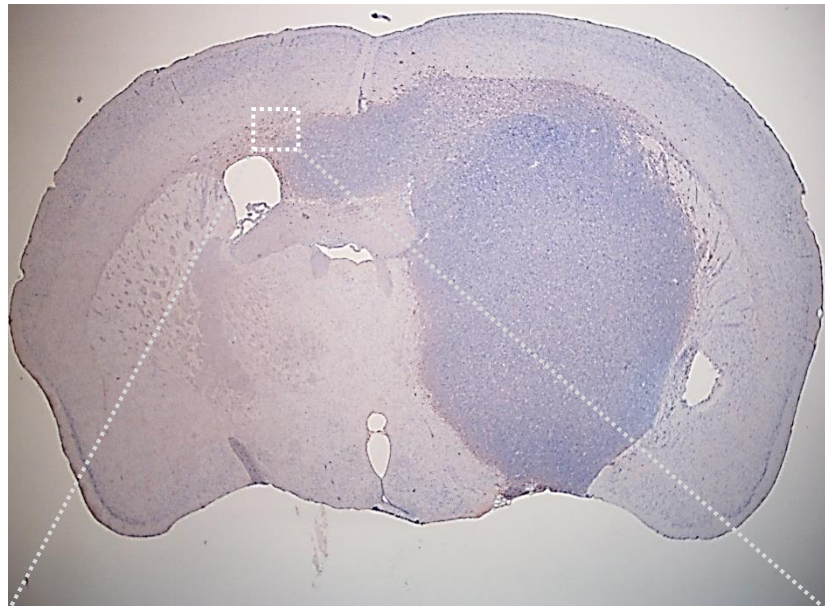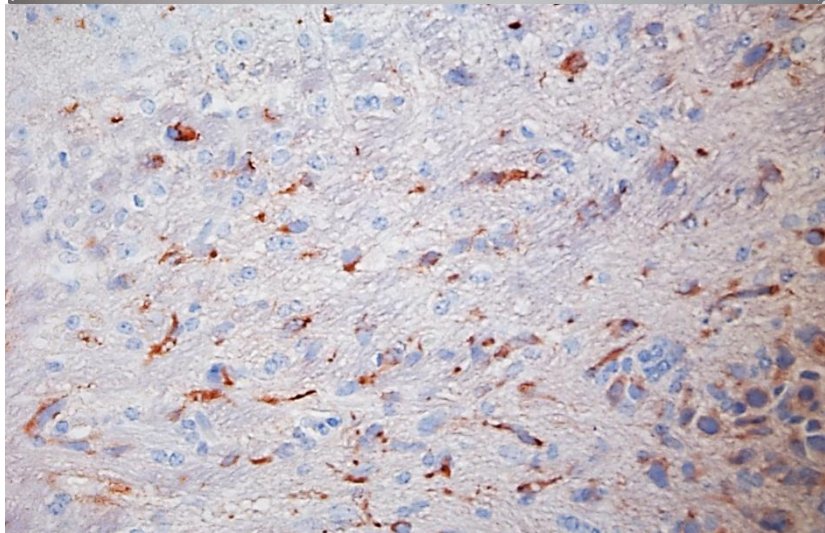

**G112 (R273H-p53)**

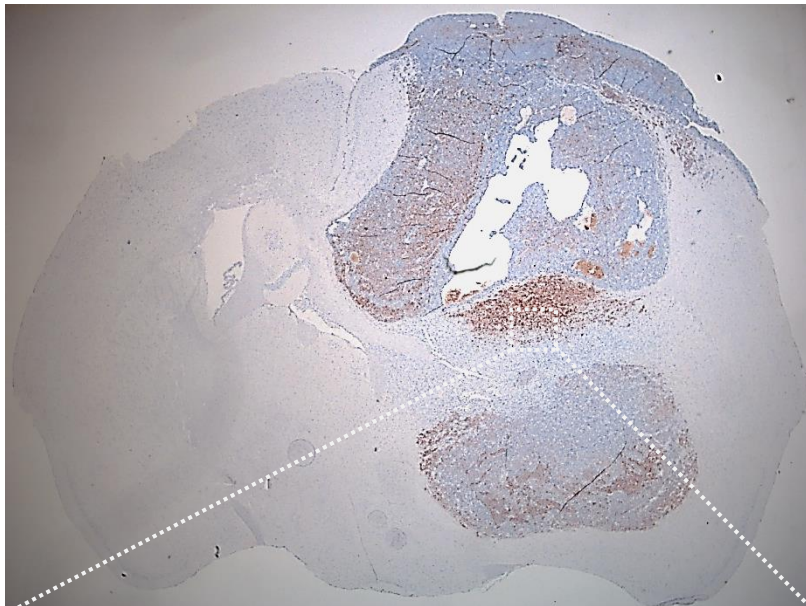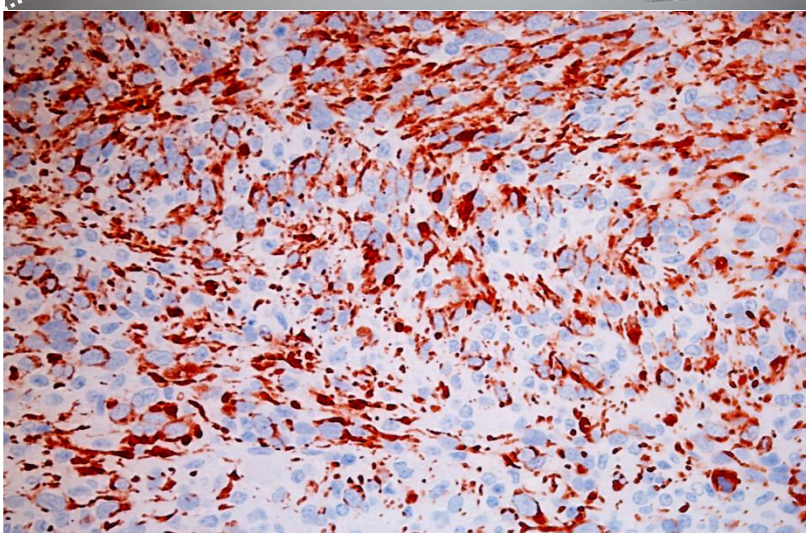

**#1095 (p53 null)**

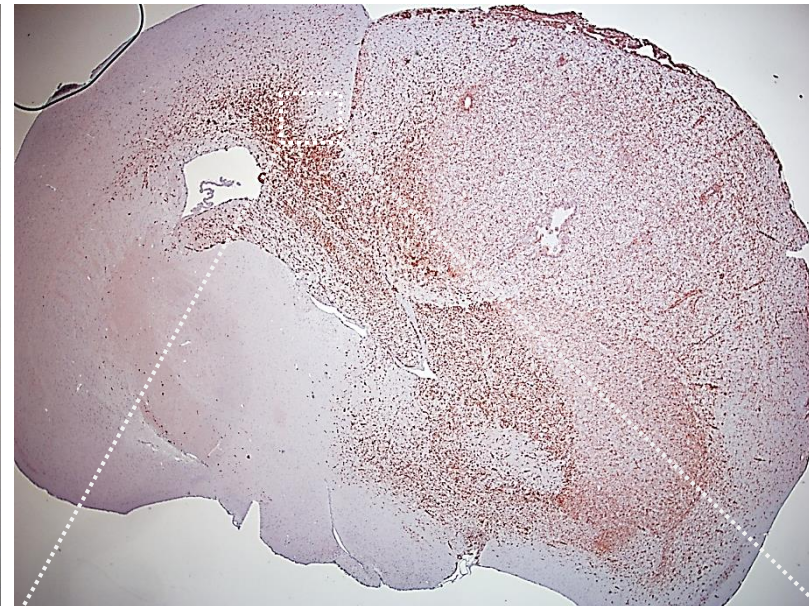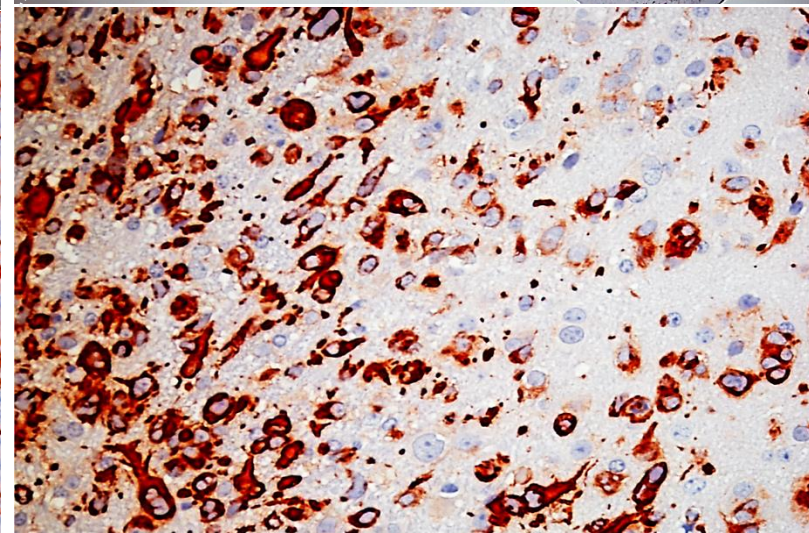

**Figure S1**



a)

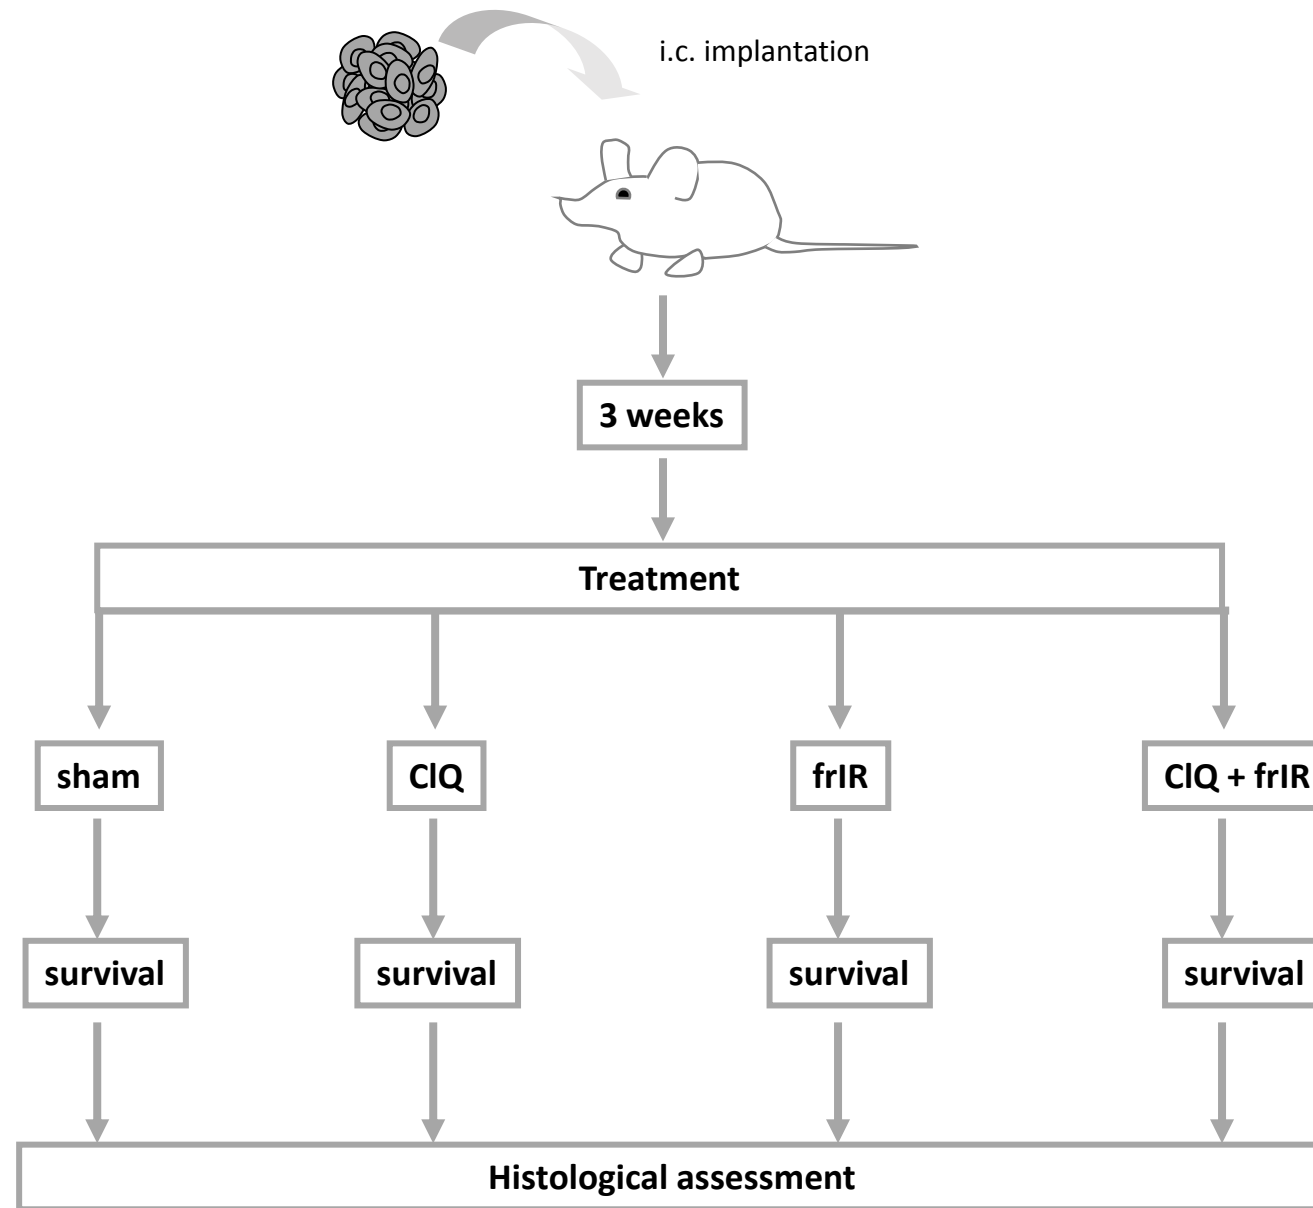

Figure S2

b)

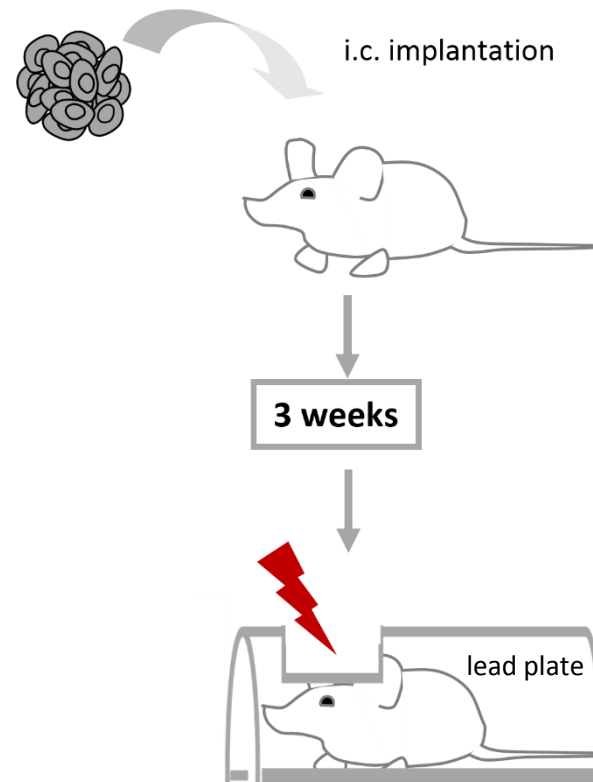

**Figure S2**

**a**

**#993 (wt p53)**

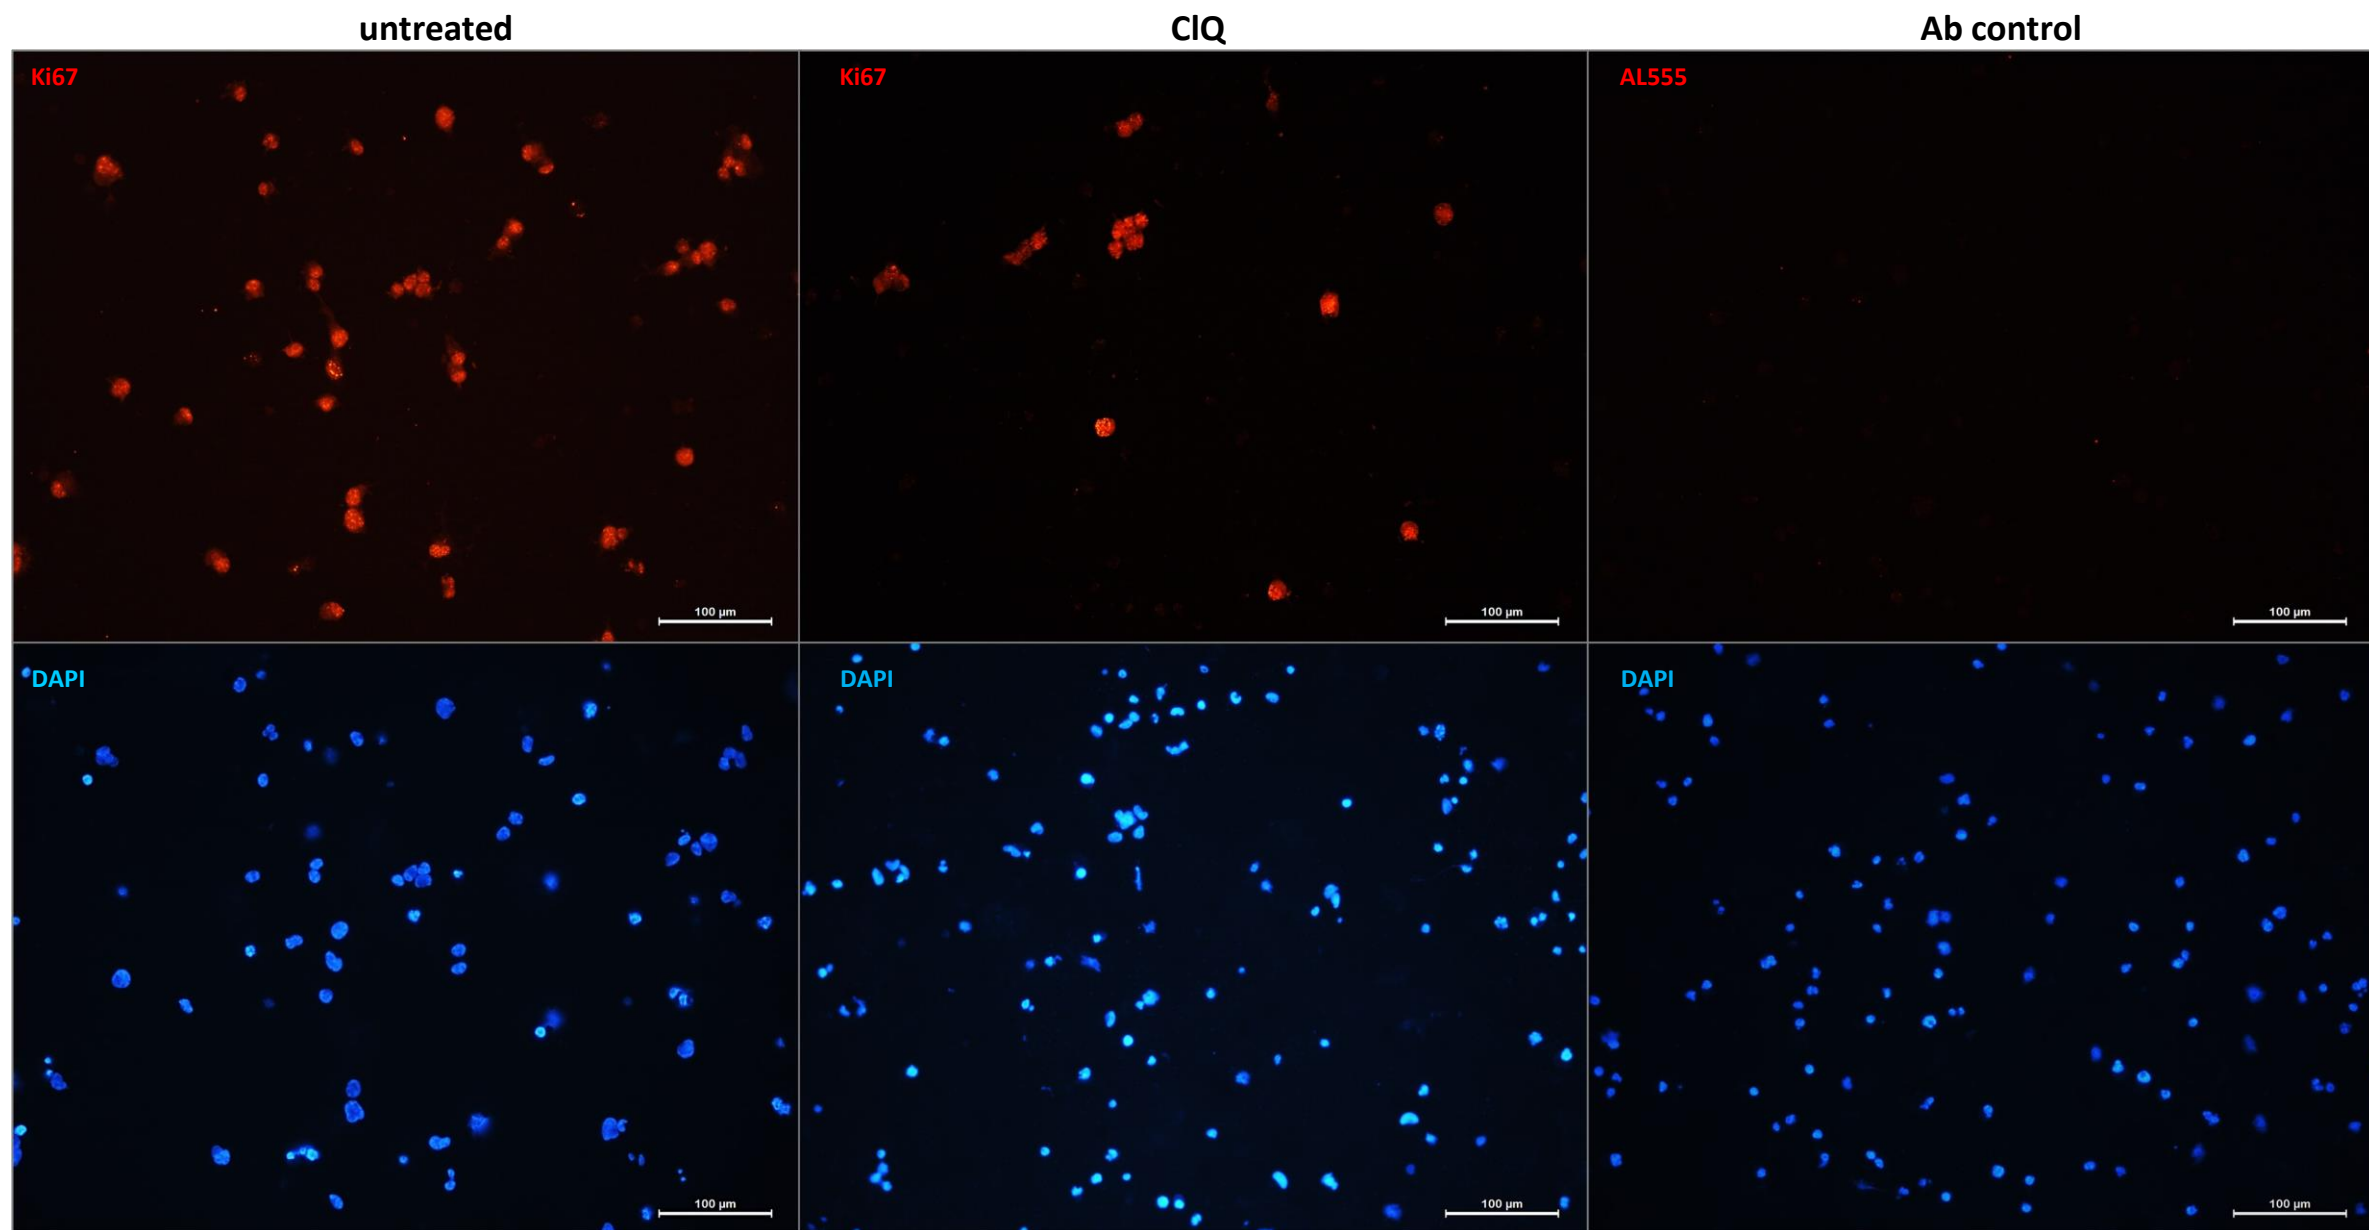

**Figure S3**

**b**

**G112 (R273H-p53)**

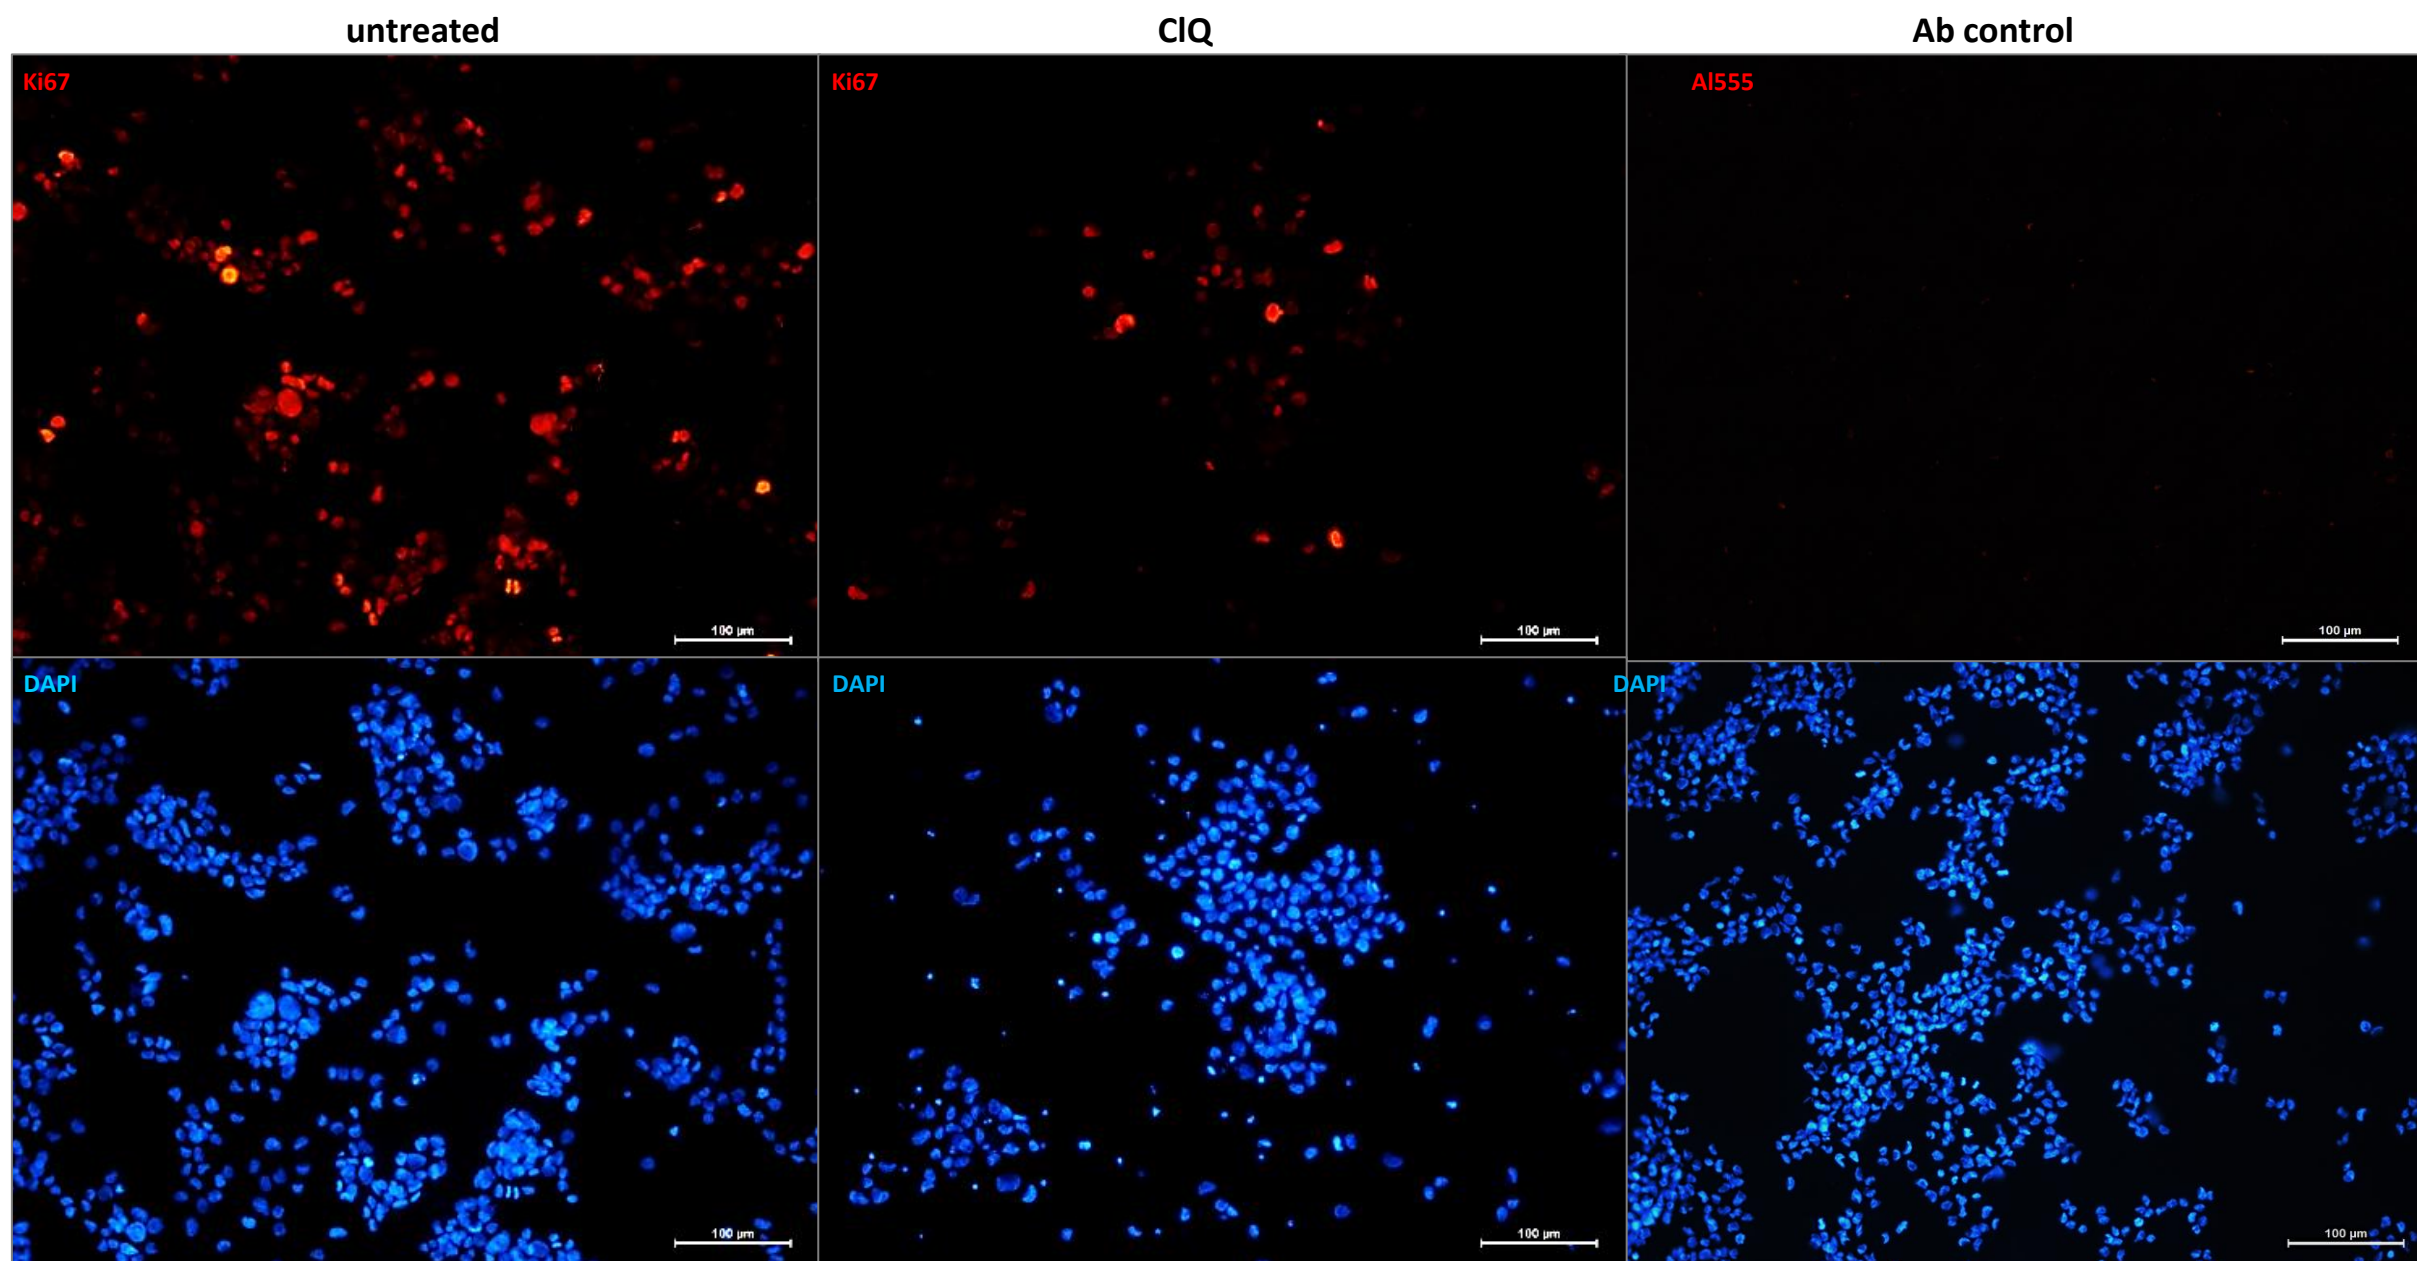

**Figure S3**

**#1095 (p53 null)**

**C**

untreated

CIQ

Ab control

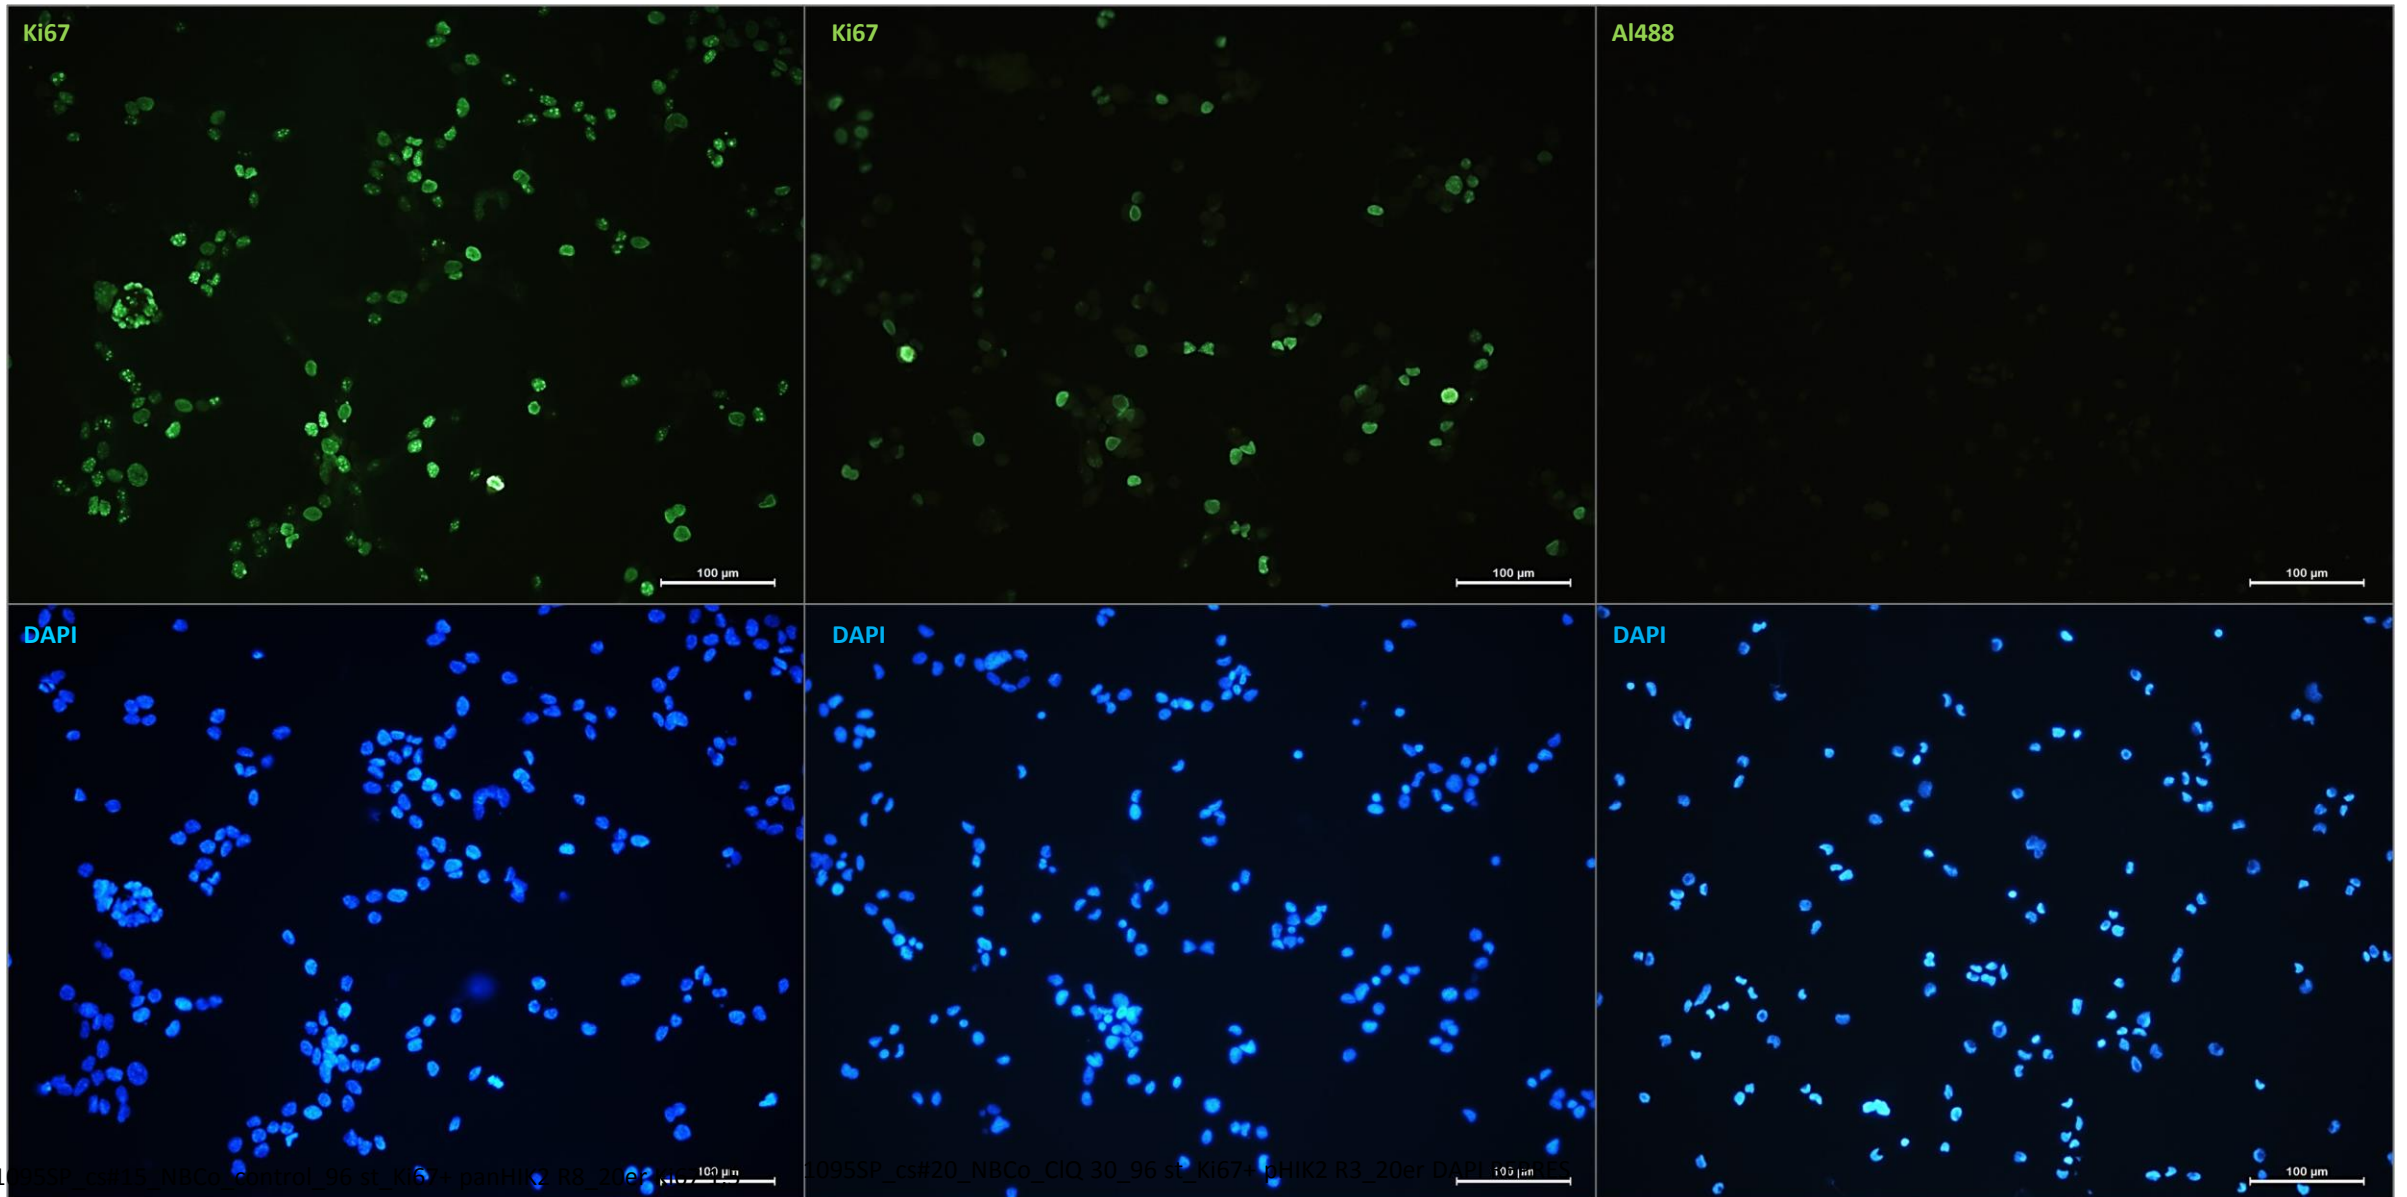

sec

**Figure S3**



**#993 (wt p53)**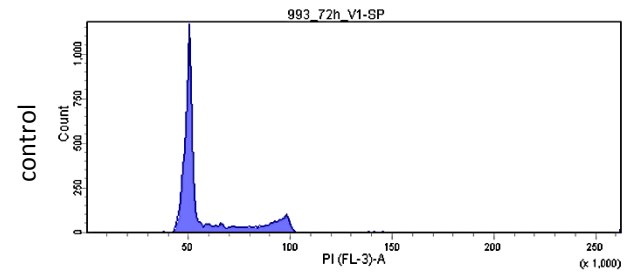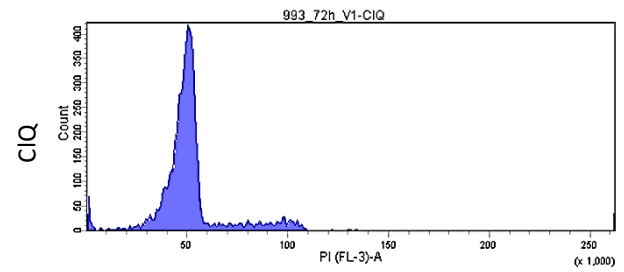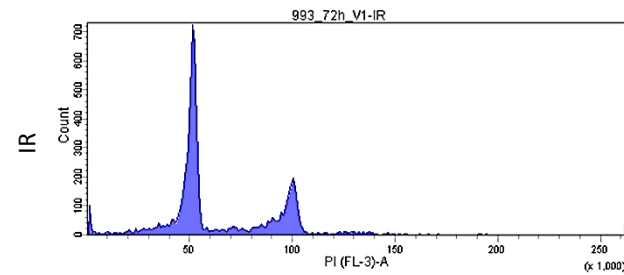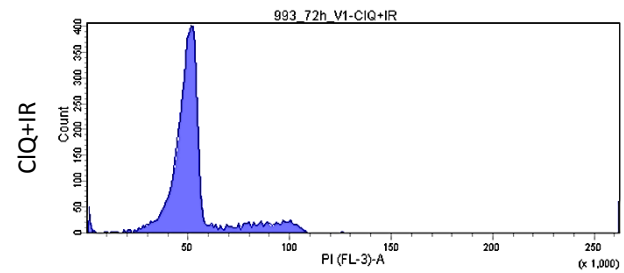**G112 (R273H-p53)**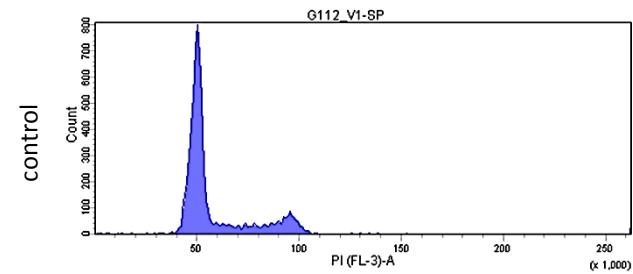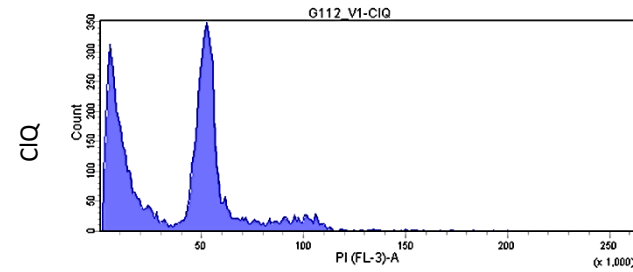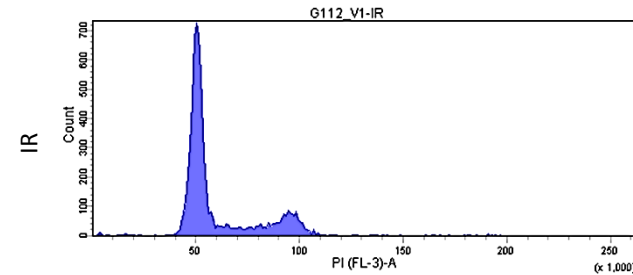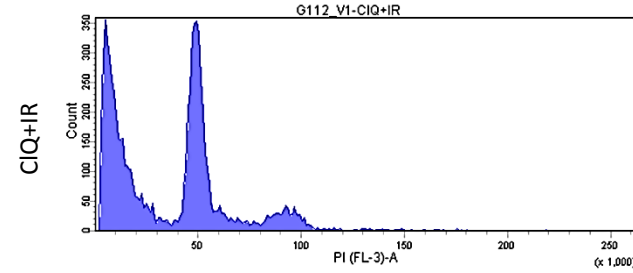**#1095 (p53 null)**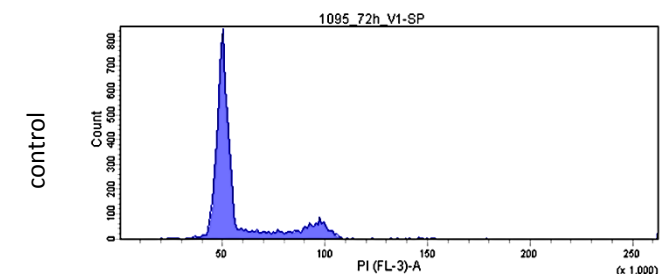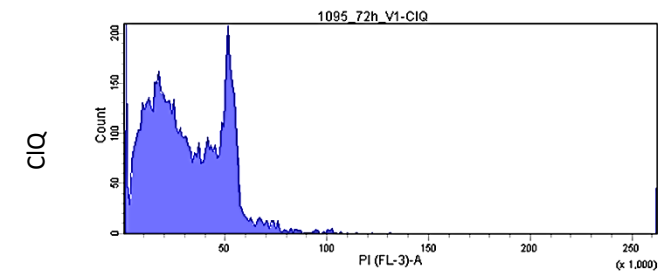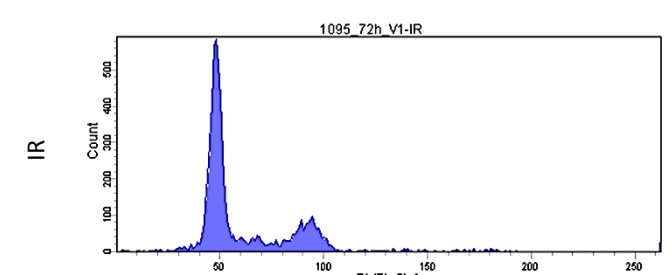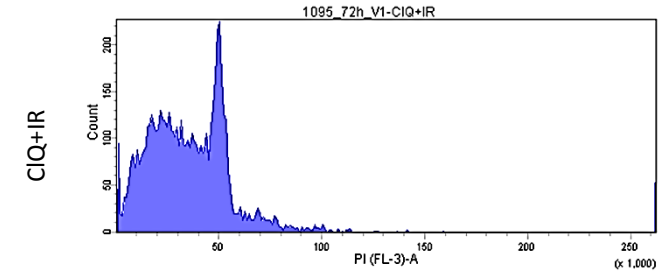**Figure S4**

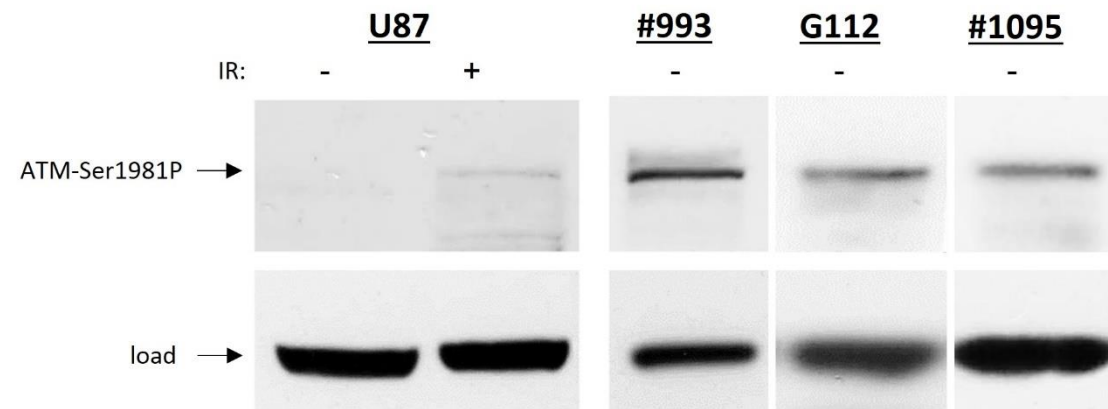

**Figure S5**

**a**

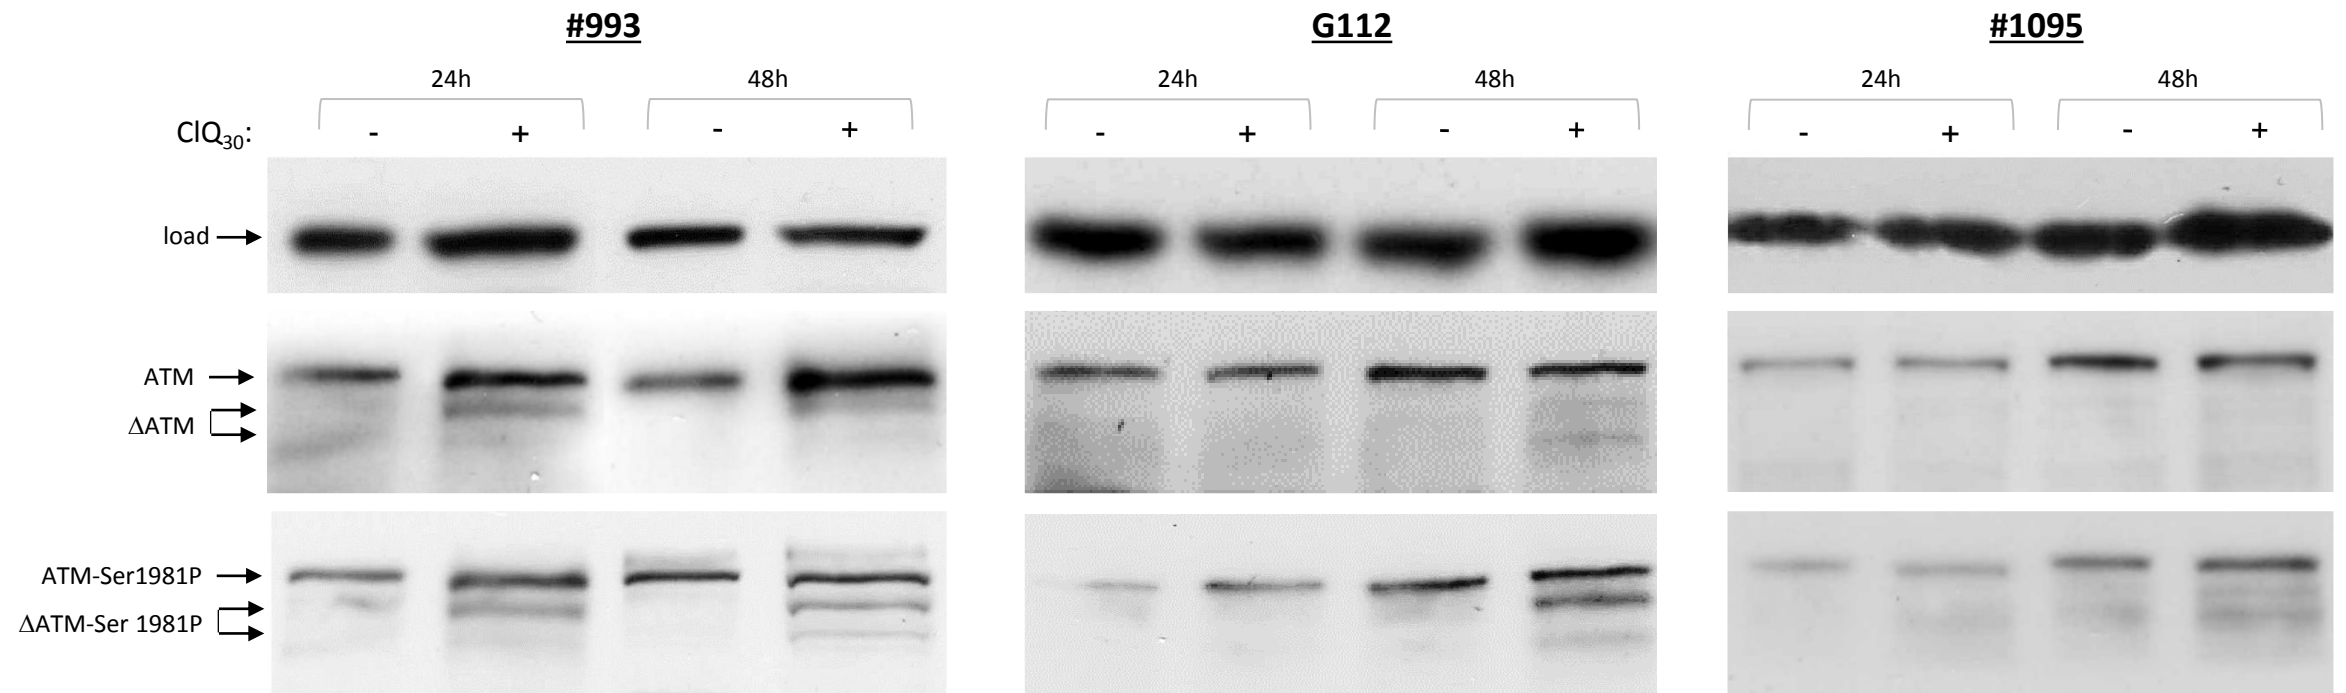

**Figure S6**



**b**

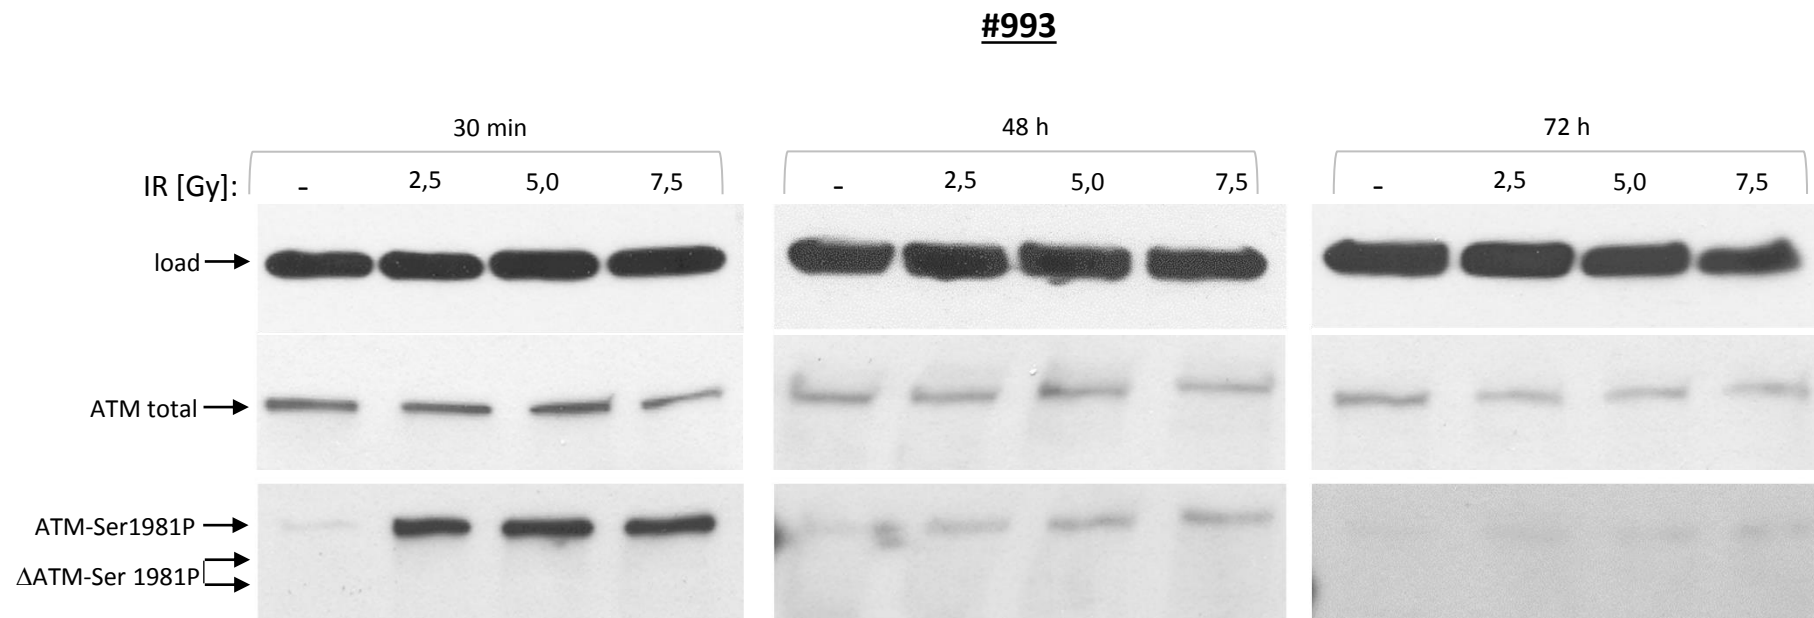

**Figure S6**

a

### CIQ\_DEGs\_#993 (wtp53)

| Probe     | Symbol   | Description                         | logFC #993 CIQ vs untreated | P.Value #993 CIQ vs untreated | FDR #993 CIQ vs untreated |
|-----------|----------|-------------------------------------|-----------------------------|-------------------------------|---------------------------|
| 10024_at  | TROAP    | trophinin associated protein (tas)  | -1,089224694                | 1,12E-008                     | 3,41E-006                 |
| 10112_at  | KIF20A   | kinesin family member 20A           | -1,51878522                 | 2,22E-010                     | 2,59E-007                 |
| 1033_at   | CDKN3    | cyclin-dependent kinase inhibitor   | -1,10629628                 | 1,04E-008                     | 3,25E-006                 |
| 10371_at  | SEMA3A   | sema domain, immunoglobulin d       | -1,371386841                | 2,95E-008                     | 6,64E-006                 |
| 10403_at  | NDC80    | NDC80 homolog, kinetochore co       | -1,479461246                | 3,28E-009                     | 1,48E-006                 |
| 10615_at  | SPAG5    | sperm associated antigen 5          | -1,125836192                | 1,09E-009                     | 7,98E-007                 |
| 1062_at   | CENPE    | centromere protein E, 312kDa        | -1,426468934                | 4,65E-008                     | 9,31E-006                 |
| 10635_at  | RAD51AP1 | RAD51 associated protein 1          | -1,327058656                | 6,99E-008                     | 1,34E-005                 |
| 10682_at  | EBP      | emopamil binding protein (sterol    | 1,25911264                  | 8,17E-010                     | 6,74E-007                 |
| 10721_at  | POLQ     | polymerase (DNA directed), thet     | -1,266294243                | 2,04E-007                     | 3,14E-005                 |
| 10733_at  | PLK4     | polo-like kinase 4 (Drosophila)     | -1,250013612                | 4,05E-008                     | 8,62E-006                 |
| 11004_at  | KIF2C    | kinesin family member 2C            | -1,34467197                 | 3,60E-009                     | 1,53E-006                 |
| 11065_at  | UBE2C    | ubiquitin-conjugating enzyme E2     | -1,077519291                | 3,40E-009                     | 1,50E-006                 |
| 11113_at  | CIT      | citron (rho-interacting, serine/thr | -1,058557873                | 2,25E-007                     | 3,38E-005                 |
| 11161_at  | C14orf1  | chromosome 14 open reading fra      | 1,119682631                 | 5,08E-008                     | 1,00E-005                 |
| 113115_at | FAM54A   | family with sequence similarity 5   | -1,043804999                | 1,83E-007                     | 2,87E-005                 |
| 1410_at   | CRYAB    | crystallin, alpha B                 | 1,026350939                 | 7,61E-009                     | 2,69E-006                 |
| 146956_at | EME1     | essential meiotic endonuclease      | -1,145995374                | 1,12E-007                     | 1,94E-005                 |
| 150221_at | RIMBP3C  | RIMS binding protein 3C             | -1,42153587                 | 0,000947503                   | 0,035251727               |
| 150468_at | CKAP2L   | cytoskeleton associated protein     | -1,450643508                | 8,81E-011                     | 1,59E-007                 |
| 151246_at | SGOL2    | shugoshin-like 2 (S. pombe)         | -1,538298644                | 3,75E-010                     | 4,12E-007                 |
| 151648_at | SGOL1    | shugoshin-like 1 (S. pombe)         | -1,302146493                | 1,51E-008                     | 4,20E-006                 |
| 157313_at | CDCA2    | cell division cycle associated 2    | -1,295357771                | 4,49E-008                     | 9,16E-006                 |
| 157570_at | ESCO2    | establishment of cohesion 1 hom     | -1,598861831                | 2,75E-008                     | 6,39E-006                 |
| 158471_at | PRUNE2   | prune homolog 2 (Drosophila)        | 1,207525049                 | 8,07E-009                     | 2,75E-006                 |
| 1717_at   | DHCR7    | 7-dehydrocholesterol reductase      | 1,347347924                 | 2,24E-011                     | 6,32E-008                 |
| 1718_at   | DHCR24   | 24-dehydrocholesterol reductase     | 1,001865609                 | 5,26E-008                     | 1,03E-005                 |
| 1763_at   | DNA2     | DNA replication helicase 2 homc     | -1,02678217                 | 2,87E-006                     | 0,000290317               |

**Figure S7**

b

| Probe     | Symbol   | Description                       | logFC #993 CIQ vs untreated | P.Value #993 CIQ vs untreated | FDR #993 CIQ vs untreated |
|-----------|----------|-----------------------------------|-----------------------------|-------------------------------|---------------------------|
| 2170_at   | FABP3    | fatty acid binding protein 3, mus | 2,005550665                 | 2,42E-009                     | 1,24E-006                 |
| 2177_at   | FANCD2   | Fanconi anemia, complementatio    | -1,160062695                | 8,79E-008                     | 1,55E-005                 |
| 2187_at   | FANCB    | Fanconi anemia, complementatio    | -1,319742454                | 7,34E-007                     | 9,50E-005                 |
| 2194_at   | FASN     | fatty acid synthase               | 1,199029246                 | 2,02E-008                     | 5,23E-006                 |
| 219790_at | RTKN2    | rhotekin 2                        | -1,58672524                 | 6,94E-008                     | 1,34E-005                 |
| 220042_at | C11orf82 | chromosome 11 open reading fra    | -1,059750794                | 1,49E-006                     | 0,000176055               |
| 220134_at | C18orf24 | chromosome 18 open reading fra    | -1,159800013                | 1,21E-008                     | 3,54E-006                 |
| 221150_at | C13orf3  | chromosome 13 open reading fra    | -1,304631264                | 8,56E-009                     | 2,82E-006                 |
| 2222_at   | FDFT1    | farnesyl-diphosphate farnesyltra  | 1,055670855                 | 8,54E-010                     | 6,76E-007                 |
| 2224_at   | FDPS     | farnesyl diphosphate synthase (f  | 1,339085985                 | 3,54E-012                     | 2,33E-008                 |
| 22974_at  | TPX2     | TPX2, microtubule-associated, h   | -1,208617691                | 5,11E-010                     | 4,92E-007                 |
| 22995_at  | CEP152   | centrosomal protein 152kDa        | -1,224930239                | 6,91E-007                     | 9,11E-005                 |
| 23175_at  | LPIN1    | lipin 1                           | 1,154855364                 | 1,15E-008                     | 3,45E-006                 |
| 23397_at  | NCAPH    | non-SMC condensin I complex, s    | -1,124297825                | 2,44E-008                     | 5,90E-006                 |
| 24137_at  | KIF4A    | kinesin family member 4A          | -1,364296701                | 2,92E-008                     | 6,64E-006                 |
| 2494_at   | NR5A2    | nuclear receptor subfamily 5, gro | -1,074243736                | 5,32E-007                     | 7,17E-005                 |
| 255394_at | TCP11L2  | t-complex 11 (mouse)-like 2       | 1,207017902                 | 2,79E-008                     | 6,41E-006                 |
| 259266_at | ASPM     | asp (abnormal spindle) homolog,   | -1,374532969                | 7,55E-009                     | 2,69E-006                 |
| 283431_at | GAS2L3   | growth arrest-specific 2 like 3   | -1,362695449                | 1,56E-009                     | 9,66E-007                 |
| 2846_at   | LPAR4    | lysophosphatidic acid receptor 4  | -1,117705621                | 2,58E-005                     | 0,00198455                |
| 284992_at | CCDC150  | coiled-coil domain containing 150 | -1,377118834                | 2,37E-009                     | 1,24E-006                 |
| 286151_at | FBXO43   | F-box protein 43                  | -1,181930841                | 2,04E-008                     | 5,23E-006                 |
| 29127_at  | RACGAP1  | Rac GTPase activating protein 1   | -1,072090453                | 1,72E-008                     | 4,73E-006                 |
| 3161_at   | HMMR     | hyaluronan-mediated motility rec  | -1,124591612                | 1,43E-007                     | 2,36E-005                 |
| 343099_at | CCDC18   | coiled-coil domain containing 18  | -1,103023973                | 1,30E-007                     | 2,21E-005                 |
| 347240_at | KIF24    | kinesin family member 24          | -1,001927841                | 1,91E-007                     | 2,98E-005                 |
| 347731_at | LRRTM3   | leucine rich repeat transmembra   | -1,054923233                | 4,63E-008                     | 9,31E-006                 |
| 3638_at   | INSIG1   | insulin induced gene 1            | 1,444487764                 | 1,39E-011                     | 4,75E-008                 |
| 375444_at | C5orf34  | chromosome 5 open reading fran    | -1,088822218                | 5,72E-007                     | 7,60E-005                 |
| 3832_at   | KIF11    | kinesin family member 11          | -1,156423099                | 7,04E-007                     | 9,17E-005                 |
| 39_at     | ACAT2    | acetyl-Coenzyme A acetyltransf    | 1,274906128                 | 1,93E-010                     | 2,38E-007                 |

Figure S7



C

| Probe    | Symbol    | Description                        | logFC #993 CIQ vs untreated | P.Value #993 CIQ vs untreated | FDR #993 CIQ vs untreated |
|----------|-----------|------------------------------------|-----------------------------|-------------------------------|---------------------------|
| 4047_at  | LSS       | lanosterol synthase (2,3-oxidosc   | 1,122695118                 | 3,54E-008                     | 7,61E-006                 |
| 4085_at  | MAD2L1    | MAD2 mitotic arrest deficient-like | -1,45495862                 | 1,75E-008                     | 4,76E-006                 |
| 4288_at  | MKI67     | antigen identified by monoclonal   | -1,122972876                | 7,75E-008                     | 1,43E-005                 |
| 4597_at  | MVD       | mevalonate (diphospho) decarbo     | 1,132866547                 | 7,88E-010                     | 6,74E-007                 |
| 4603_at  | MYBL1     | v-myb myeloblastosis viral onco    | -1,160321916                | 3,89E-007                     | 5,61E-005                 |
| 4751_at  | NEK2      | NIMA (never in mitosis gene a)-r   | -1,260741692                | 2,44E-009                     | 1,24E-006                 |
| 50814_at | NSDHL     | NAD(P) dependent steroid dehyd     | 1,253678078                 | 3,94E-011                     | 9,74E-008                 |
| 51203_at | NUSAP1    | nucleolar and spindle associated   | -1,269184356                | 7,87E-009                     | 2,73E-006                 |
| 51478_at | HSD17B7   | hydroxysteroid (17-beta) dehydro   | 1,222537624                 | 0,00013483                    | 0,00760309                |
| 51512_at | GTSE1     | G-2 and S-phase expressed 1        | -1,143496205                | 1,21E-008                     | 3,54E-006                 |
| 53353_at | LRP1B     | low density lipoprotein-related pr | 1,022647953                 | 4,71E-007                     | 6,66E-005                 |
| 5347_at  | PLK1      | polo-like kinase 1 (Drosophila)    | -1,24526622                 | 1,34E-009                     | 8,55E-007                 |
| 54443_at | ANLN      | anillin, actin binding protein     | -1,388659462                | 1,06E-009                     | 7,98E-007                 |
| 54478_at | FAM64A    | family with sequence similarity 6  | -1,228741633                | 8,95E-008                     | 1,57E-005                 |
| 54821_at | ERCC6L    | excision repair cross-complemen    | -1,615998378                | 2,03E-008                     | 5,23E-006                 |
| 54873_at | PALMD     | palmdelphin                        | -1,026847857                | 4,90E-007                     | 6,83E-005                 |
| 54892_at | NCAPG2    | non-SMC condensin II complex,      | -1,055511832                | 5,54E-009                     | 2,07E-006                 |
| 55010_at | C12orf48  | chromosome 12 open reading fra     | -1,378058059                | 8,46E-008                     | 1,51E-005                 |
| 55143_at | CDCA8     | cell division cycle associated 8   | -1,201909605                | 1,19E-006                     | 0,000147179               |
| 55215_at | FANCI     | Fanconi anemia, complementatio     | -1,0866537                  | 5,07E-007                     | 6,97E-005                 |
| 55247_at | NEIL3     | nei endonuclease VIII-like 3 (E. c | -1,474875965                | 2,26E-009                     | 1,24E-006                 |
| 55320_at | C14orf106 | chromosome 14 open reading fra     | -1,181587058                | 8,28E-008                     | 1,50E-005                 |
| 55329_at | MNS1      | meiosis-specific nuclear structur  | -1,351894559                | 1,28E-007                     | 2,19E-005                 |
| 55345_at | C4orf21   | chromosome 4 open reading fran     | -1,055603862                | 1,27E-006                     | 0,000154107               |
| 55355_at | HJURP     | Holliday junction recognition prot | -1,190856709                | 7,39E-009                     | 2,69E-006                 |
| 55388_at | MCM10     | minichromosome maintenance c       | -1,034739786                | 2,76E-006                     | 0,000282633               |
| 55635_at | DEPDC1    | DEP domain containing 1            | -1,203446411                | 1,39E-007                     | 2,32E-005                 |
| 55771_at | PRR11     | proline rich 11                    | -1,202912243                | 3,88E-009                     | 1,54E-006                 |
| 55789_at | DEPDC1B   | DEP domain containing 1B           | -1,244595019                | 9,81E-009                     | 3,13E-006                 |
| 55872_at | PBK       | PDZ binding kinase                 | -1,601857891                | 3,90E-009                     | 1,54E-006                 |

Figure S7

d

| Probe     | Symbol   | Description                                        | logFC #993 CIQ vs untreated | P.Value #993 CIQ vs untreated | FDR #993 CIQ vs untreated |
|-----------|----------|----------------------------------------------------|-----------------------------|-------------------------------|---------------------------|
| 55902_at  | ACSS2    | acyl-CoA synthetase short-chain                    | 1,270824058                 | 1,24E-010                     | 1,98E-007                 |
| 56992_at  | KIF15    | kinesin family member 15                           | -1,473551451                | 3,04E-008                     | 6,75E-006                 |
| 57082_at  | CASC5    | cancer susceptibility candidate 5                  | -1,493793006                | 2,72E-008                     | 6,39E-006                 |
| 57405_at  | SPC25    | SPC25, NDC80 kinetochore component                 | -1,472807972                | 5,28E-012                     | 2,61E-008                 |
| 57650_at  | KIAA1524 | KIAA1524                                           | -1,209168964                | 4,33E-008                     | 8,95E-006                 |
| 5983_at   | RFC3     | replication factor C (activator 1) 3               | -1,054531028                | 2,69E-008                     | 6,39E-006                 |
| 6241_at   | RRM2     | ribonucleotide reductase M2 polypeptide            | -1,138488224                | 1,05E-008                     | 3,25E-006                 |
| 6307_at   | SC4MOL   | sterol-C4-methyl oxidase-like                      | 1,17905442                  | 1,80E-008                     | 4,81E-006                 |
| 6319_at   | SCD      | stearoyl-CoA desaturase (delta-9)                  | 1,275894886                 | 2,80E-014                     | 5,53E-010                 |
| 64105_at  | CENPK    | centromere protein K                               | -1,08765816                 | 2,33E-008                     | 5,69E-006                 |
| 64151_at  | NCAPG    | non-SMC condensin I complex, subunit G             | -1,274424255                | 2,08E-009                     | 1,20E-006                 |
| 6491_at   | STIL     | SCL/TAL1 interrupting locus                        | -1,14454901                 | 1,38E-008                     | 3,95E-006                 |
| 6565_at   | SLC15A2  | solute carrier family 15 (H <sup>+</sup> /peptide) | -1,047785742                | 1,00E-005                     | 0,000872656               |
| 675_at    | BRCA2    | breast cancer 2, early onset                       | -1,013227035                | 1,22E-006                     | 0,000150047               |
| 677807_at | SNORA22  | small nucleolar RNA, H/ACA box                     | 1,071728985                 | 0,001066584                   | 0,038037664               |
| 6790_at   | AURKA    | aurora kinase A                                    | -1,125210189                | 8,51E-009                     | 2,82E-006                 |
| 699_at    | BUB1     | budding uninhibited by benzimidazole               | -1,408561792                | 1,29E-009                     | 8,48E-007                 |
| 7018_at   | TF       | transferrin                                        | 1,623492994                 | 4,35E-009                     | 1,69E-006                 |
| 701_at    | BUB1B    | budding uninhibited by benzimidazole               | -1,433215512                | 6,59E-011                     | 1,30E-007                 |
| 7108_at   | TM7SF2   | transmembrane 7 superfamily member                 | 1,339665049                 | 5,01E-010                     | 4,92E-007                 |
| 7143_at   | TNR      | tenascin R (restrictin, janusin)                   | -1,140439309                | 1,69E-005                     | 0,001392452               |
| 7153_at   | TOP2A    | topoisomerase (DNA) II alpha 17                    | -1,222894022                | 2,11E-009                     | 1,20E-006                 |
| 7272_at   | TTK      | TTK protein kinase                                 | -1,707133652                | 1,59E-010                     | 2,10E-007                 |
| 7516_at   | XRCC2    | X-ray repair complementing defective               | -1,011422703                | 7,40E-007                     | 9,51E-005                 |
| 79071_at  | ELOVL6   | ELOVL family member 6, elongation                  | 1,003205781                 | 3,96E-007                     | 5,68E-005                 |
| 79733_at  | E2F8     | E2F transcription factor 8                         | -1,302816466                | 1,98E-009                     | 1,19E-006                 |
| 79801_at  | SHCBP1   | SHC SH2-domain binding protein                     | -1,219004921                | 3,64E-009                     | 1,53E-006                 |
| 7984_at   | ARHGEF5  | Rho guanine nucleotide exchange                    | 1,590642658                 | 0,000468802                   | 0,02071204                |
| 79866_at  | C13orf34 | chromosome 13 open reading frame                   | -1,486829361                | 6,54E-011                     | 1,30E-007                 |
| 81624_at  | DIAPH3   | diaphanous homolog 3 (Drosophila)                  | -1,173999252                | 2,26E-007                     | 3,38E-005                 |
| 81930_at  | KIF18A   | kinesin family member 18A                          | -1,540900917                | 3,36E-008                     | 7,30E-006                 |

Figure S7

e

| Probe    | Symbol    | Description                        | logFC #993 CIQ vs untreated | P.Value #993 CIQ vs untreated | FDR #993 CIQ vs untreated |
|----------|-----------|------------------------------------|-----------------------------|-------------------------------|---------------------------|
| 8342_at  | HIST1H2BM | histone cluster 1, H2bm            | -1,053868785                | 2,55E-005                     | 0,001967854               |
| 83461_at | CDCA3     | cell division cycle associated 3   | -1,433633318                | 2,68E-012                     | 2,33E-008                 |
| 83540_at | NUF2      | NUF2, NDC80 kinetochore comp       | -1,310186527                | 2,53E-009                     | 1,25E-006                 |
| 83990_at | BRIP1     | BRCA1 interacting protein C-terr   | -1,034453779                | 2,19E-006                     | 0,000240308               |
| 84824_at | FCRLA     | Fc receptor-like A                 | 1,158022788                 | 1,40E-010                     | 1,98E-007                 |
| 890_at   | CCNA2     | cyclin A2                          | -1,254531232                | 2,72E-009                     | 1,28E-006                 |
| 891_at   | CCNB1     | cyclin B1                          | -1,503325343                | 1,44E-011                     | 4,75E-008                 |
| 89839_at | ARHGAP11E | Rho GTPase activating protein 1    | -1,489673573                | 8,84E-009                     | 2,87E-006                 |
| 9055_at  | PRC1      | protein regulator of cytokinesis 1 | -1,235860321                | 2,73E-009                     | 1,28E-006                 |
| 9133_at  | CCNB2     | cyclin B2                          | -1,239027552                | 4,34E-008                     | 8,95E-006                 |
| 9134_at  | CCNE2     | cyclin E2                          | -1,042230477                | 1,25E-006                     | 0,000152591               |
| 9156_at  | EXO1      | exonuclease 1                      | -1,254033153                | 3,58E-007                     | 5,21E-005                 |
| 92211_at | PCDH21    | protocadherin 21                   | 1,146903181                 | 1,16E-009                     | 8,23E-007                 |
| 9232_at  | PTTG1     | pituitary tumor-transforming 1     | -1,110943355                | 7,05E-008                     | 1,34E-005                 |
| 9415_at  | FADS2     | fatty acid desaturase 2            | 1,055782386                 | 2,79E-009                     | 1,29E-006                 |
| 9493_at  | KIF23     | kinesin family member 23           | -1,427337386                | 1,38E-010                     | 1,98E-007                 |
| 9585_at  | KIF20B    | kinesin family member 20B          | -1,270617743                | 2,68E-007                     | 3,96E-005                 |
| 9768_at  | KIAA0101  | KIAA0101                           | -1,144136781                | 4,81E-007                     | 6,75E-005                 |
| 9787_at  | DLGAP5    | discs, large (Drosophila) homolo   | -1,520557272                | 1,22E-009                     | 8,32E-007                 |
| 9824_at  | ARHGAP11A | Rho GTPase activating protein 1    | -1,181800944                | 5,43E-007                     | 7,26E-005                 |
| 9833_at  | MELK      | maternal embryonic leucine zipp    | -1,076852765                | 4,30E-008                     | 8,95E-006                 |
| 983_at   | CDC2      | cell division cycle 2, G1 to S and | -1,563353634                | 7,09E-010                     | 6,38E-007                 |
| 9928_at  | KIF14     | kinesin family member 14           | -1,401389389                | 3,81E-009                     | 1,54E-006                 |
| 995_at   | CDC25C    | cell division cycle 25 homolog C   | -1,261221854                | 1,49E-008                     | 4,20E-006                 |

Figure S7



a

# **CIQ\_DEGs\_G112 (R273H)**

| Probe        | Symbol       | Description                                          | logFC G112 CIQ vs untr | P.Value G112 CIQ vs untr | FDR G112 CIQ vs untr |
|--------------|--------------|------------------------------------------------------|------------------------|--------------------------|----------------------|
| 100033805_at | SNORD115-31  | small nucleolar RNA, C/D box 115-31                  | -0,711657548           | 1,96E-006                | 6,54E-005            |
| 10007_at     | GNPDA1       | glucosamine-6-phosphate deaminase 1                  | 0,772892               | 5,71E-012                | 1,53E-009            |
| 100129196_at | LOC100129196 | similar to hCG2033298                                | -0,616059764           | 7,91E-005                | 0,001399894          |
| 100129762_at | LOC100129762 | similar to KIAA0367                                  | 1,103630612            | 5,42E-015                | 4,13E-012            |
| 100133188_at | LOC100133364 | hypothetical LOC100133364                            | 0,91738411             | 3,21E-014                | 1,99E-011            |
| 10085_at     | EDIL3        | EGF-like repeats and discoidin I-like domains 3      | -1,069723465           | 4,65E-015                | 3,68E-012            |
| 10112_at     | KIF20A       | kinesin family member 20A                            | -0,704770275           | 3,55E-011                | 6,75E-009            |
| 10253_at     | SPRY2        | sprouty homolog 2 (Drosophila)                       | -0,946604911           | 2,78E-014                | 1,83E-011            |
| 10371_at     | SEMA3A       | sema domain, immunoglobulin domain (Ig), short b     | -0,734522097           | 8,19E-012                | 2,11E-009            |
| 10437_at     | IFI30        | interferon, gamma-inducible protein 30               | 1,079246586            | 1,21E-013                | 5,30E-011            |
| 10457_at     | GPNUMB       | glycoprotein (transmembrane) numb                    | 2,311213114            | 6,03E-023                | 1,19E-018            |
| 10493_at     | VAT1         | vesicle amine transport protein 1 homolog (T. califc | 0,663255905            | 2,21E-010                | 3,24E-008            |
| 10577_at     | NPC2         | Niemann-Pick disease, type C2                        | 1,004417609            | 1,18E-013                | 5,30E-011            |
| 10769_at     | PLK2         | polo-like kinase 2 (Drosophila)                      | -0,585759398           | 1,31E-009                | 1,40E-007            |
| 10891_at     | PPARGC1A     | peroxisome proliferator-activated receptor gamma,    | 0,698675129            | 2,52E-012                | 7,67E-010            |
| 11010_at     | GLIPR1       | GLI pathogenesis-related 1                           | -0,860821051           | 5,12E-014                | 2,60E-011            |
| 1116_at      | CHI3L1       | chitinase 3-like 1 (cartilage glycoprotein-39)       | -0,646882965           | 3,46E-011                | 6,75E-009            |
| 112770_at    | C1orf85      | chromosome 1 open reading frame 85                   | 0,585853019            | 1,38E-010                | 2,17E-008            |
| 113146_at    | AHNAK2       | AHNAK nucleoprotein 2                                | 0,596022265            | 5,59E-009                | 4,81E-007            |
| 114907_at    | FBXO32       | F-box protein 32                                     | 1,153858498            | 9,41E-016                | 1,02E-012            |
| 116496_at    | FAM129A      | family with sequence similarity 129, member A        | 0,776804015            | 1,54E-012                | 4,83E-010            |
| 1183_at      | CLCN4        | chloride channel 4                                   | 0,592528217            | 3,04E-010                | 4,23E-008            |
| 1186_at      | CLCN7        | chloride channel 7                                   | 0,758483866            | 4,17E-011                | 7,72E-009            |
| 1193_at      | CLIC2        | chloride intracellular channel 2                     | 0,762183175            | 5,06E-012                | 1,39E-009            |
| 1200_at      | TPP1         | tripeptidyl peptidase I                              | 1,190330849            | 9,33E-017                | 2,05E-013            |
| 1244_at      | ABCC2        | ATP-binding cassette, sub-family C (CFTR/MRP),       | 0,630896828            | 1,07E-012                | 3,60E-010            |
| 128344_at    | C1orf88      | chromosome 1 open reading frame 88                   | 0,653802258            | 9,36E-010                | 1,06E-007            |
| 128637_at    | TBC1D20      | TBC1 domain family, member 20                        | 0,638969224            | 2,47E-013                | 1,00E-010            |
| 134429_at    | STARD4       | StAR-related lipid transfer (START) domain contain   | 0,872170769            | 5,87E-013                | 2,08E-010            |

**Figure S8**

b

| Probe     | Symbol  | Description                                              | logFC G112 CIQ vs untr | P.Value G112 CIQ vs untr | FDR G112 CIQ vs untr |
|-----------|---------|----------------------------------------------------------|------------------------|--------------------------|----------------------|
| 138639_at | PTPDC1  | protein tyrosine phosphatase domain containing 1         | 0,893940432            | 1,88E-015                | 1,77E-012            |
| 1435_at   | CSF1    | colony stimulating factor 1 (macrophage)                 | 0,807308891            | 8,32E-014                | 4,02E-011            |
| 1491_at   | CTH     | cystathionase (cystathionine gamma-lyase)                | 0,699884596            | 2,55E-011                | 5,43E-009            |
| 1497_at   | CTNS    | cystinosis, nephropathic                                 | 0,612474241            | 2,51E-009                | 2,42E-007            |
| 1509_at   | CTSD    | cathepsin D                                              | 0,62345171             | 4,59E-011                | 8,33E-009            |
| 153222_at | C5orf41 | chromosome 5 open reading frame 41                       | 0,610044575            | 7,25E-009                | 6,01E-007            |
| 158471_at | PRUNE2  | prune homolog 2 (Drosophila)                             | 1,095021586            | 2,23E-016                | 4,02E-013            |
| 162394_at | SLFN5   | schlafen family member 5                                 | 1,087347333            | 2,90E-016                | 4,42E-013            |
| 1649_at   | DDIT3   | DNA-damage-inducible transcript 3                        | 1,608247203            | 2,40E-019                | 1,19E-015            |
| 1717_at   | DHCR7   | 7-dehydrocholesterol reductase                           | 0,800342565            | 1,02E-014                | 7,18E-012            |
| 1848_at   | DUSP6   | dual specificity phosphatase 6                           | -1,439855174           | 7,01E-018                | 2,31E-014            |
| 1958_at   | EGR1    | early growth response 1                                  | -1,025198827           | 9,76E-016                | 1,02E-012            |
| 202374_at | STK32A  | serine/threonine kinase 32A                              | 0,737348076            | 3,94E-010                | 5,28E-008            |
| 2035_at   | EPB41   | erythrocyte membrane protein band 4.1 (elliptocyte)      | 0,7715115              | 1,00E-012                | 3,43E-010            |
| 2113_at   | ETS1    | vets erythroblastosis virus E26 oncogene homolog 1       | 0,611114762            | 1,90E-012                | 5,86E-010            |
| 2118_at   | ETV4    | ets variant gene 4 (E1A enhancer binding protein, ets-1) | -1,106373552           | 8,68E-017                | 2,05E-013            |
| 2119_at   | ETV5    | ets variant gene 5 (ets-related molecule)                | -0,850582169           | 1,13E-013                | 5,30E-011            |
| 2180_at   | ACSL1   | acyl-CoA synthetase long-chain family member 1           | 0,871186309            | 4,42E-012                | 1,25E-009            |
| 218_at    | ALDH3A1 | aldehyde dehydrogenase 3 family, member A1               | -0,688470108           | 3,21E-011                | 6,49E-009            |
| 2194_at   | FASN    | fatty acid synthase                                      | 1,073975374            | 2,15E-014                | 1,46E-011            |
| 2196_at   | FAT2    | FAT tumor suppressor homolog 2 (Drosophila)              | -1,169895931           | 9,20E-016                | 1,02E-012            |
| 2222_at   | FDFT1   | farnesyl-diphosphate farnesyltransferase 1               | 0,672728934            | 4,43E-012                | 1,25E-009            |
| 222484_at | LNK2    | ligand of numb-protein X 2                               | 0,595088032            | 5,21E-010                | 6,69E-008            |
| 2224_at   | FDPS    | farnesyl diphosphate synthase (farnesyl pyrophosphatase) | 0,764947299            | 1,37E-011                | 3,15E-009            |
| 2239_at   | GPC4    | glypican 4                                               | -0,722340733           | 1,15E-009                | 1,25E-007            |
| 22822_at  | PHLDA1  | pleckstrin homology-like domain, family A, member 1      | -0,662269737           | 8,84E-012                | 2,24E-009            |
| 22885_at  | ABLIM3  | actin binding LIM protein family, member 3               | 0,90697846             | 4,36E-014                | 2,33E-011            |
| 23007_at  | PLCH1   | phospholipase C, eta 1                                   | -0,810270617           | 9,92E-011                | 1,61E-008            |
| 23175_at  | LPIN1   | lipin 1                                                  | 1,230766508            | 1,20E-018                | 4,74E-015            |
| 2353_at   | FOS     | v-fos FBJ murine osteosarcoma viral oncogene homolog 1   | -0,660050583           | 6,52E-010                | 7,96E-008            |

Figure S8

C

| Probe     | Symbol    | Description                                         | logFC G112 CIQ vs untr | P.Value G112 CIQ vs untr | FDR G112 CIQ vs untr |
|-----------|-----------|-----------------------------------------------------|------------------------|--------------------------|----------------------|
| 23645_at  | PPP1R15A  | protein phosphatase 1, regulatory (inhibitor) subun | 0,667043088            | 1,01E-009                | 1,12E-007            |
| 24137_at  | KIF4A     | kinesin family member 4A                            | -0,585464805           | 2,48E-007                | 1,14E-005            |
| 2512_at   | FTL       | ferritin, light polypeptide                         | 0,950172466            | 2,30E-008                | 1,57E-006            |
| 254958_at | REXO1L1   | REX1, RNA exonuclease 1 homolog (S. cerevisiae)     | -0,824506223           | 0,001323898              | 0,012665015          |
| 255394_at | TCP11L2   | t-complex 11 (mouse)-like 2                         | 0,749514758            | 7,26E-011                | 1,23E-008            |
| 255743_at | NPNT      | nephronectin                                        | -0,608863384           | 3,75E-011                | 7,00E-009            |
| 255928_at | SYT14     | synaptotagmin XIV                                   | 0,610114951            | 7,89E-010                | 9,30E-008            |
| 256987_at | SERINC5   | serine incorporator 5                               | 0,848234005            | 2,83E-012                | 8,50E-010            |
| 25925_at  | ZNF521    | zinc finger protein 521                             | -0,70464454            | 5,68E-011                | 1,01E-008            |
| 25928_at  | SOSTDC1   | sclerostin domain containing 1                      | 1,11510801             | 1,20E-013                | 5,30E-011            |
| 26278_at  | SACS      | spastic ataxia of Charlevoix-Saguenay (sacsin)      | -0,627395584           | 6,21E-010                | 7,68E-008            |
| 2669_at   | GEM       | GTP binding protein overexpressed in skeletal mus   | 1,007800216            | 7,45E-015                | 5,46E-012            |
| 2673_at   | GFPT1     | glutamine-fructose-6-phosphate transaminase 1       | 0,608666162            | 1,57E-011                | 3,49E-009            |
| 27303_at  | RBMS3     | RNA binding motif, single stranded interacting prot | -0,635668305           | 4,44E-010                | 5,86E-008            |
| 2799_at   | GNS       | glucosamine (N-acetyl)-6-sulfatase                  | 0,675557754            | 8,49E-010                | 9,83E-008            |
| 2805_at   | GOT1      | glutamic-oxaloacetic transaminase 1, soluble (asp   | 0,790836376            | 1,65E-010                | 2,55E-008            |
| 2835_at   | GPR12     | G protein-coupled receptor 12                       | -0,595811745           | 4,65E-006                | 0,000137228          |
| 28526_at  | TRDC      | T cell receptor delta constant                      | -1,100143064           | 3,49E-014                | 2,03E-011            |
| 285605_at | DTWD2     | DTW domain containing 2                             | 0,978515203            | 8,66E-013                | 3,01E-010            |
| 285888_at | CNPY1     | canopy 1 homolog (zebrafish)                        | -0,630820844           | 5,96E-011                | 1,03E-008            |
| 287_at    | ANK2      | ankyrin 2, neuronal                                 | 0,663831171            | 8,75E-010                | 1,01E-007            |
| 28951_at  | TRIB2     | tribbles homolog 2 (Drosophila)                     | -0,741080095           | 9,76E-011                | 1,61E-008            |
| 2896_at   | GRN       | granulin                                            | 0,762058638            | 3,64E-011                | 6,87E-009            |
| 3037_at   | HAS2      | hyaluronan synthase 2                               | -0,6196211             | 2,55E-010                | 3,66E-008            |
| 3073_at   | HEXA      | hexosaminidase A (alpha polypeptide)                | 0,812087917            | 1,85E-013                | 7,80E-011            |
| 3156_at   | HMGCR     | 3-hydroxy-3-methylglutaryl-Coenzyme A reductase     | 0,694954585            | 2,04E-010                | 3,08E-008            |
| 3157_at   | HMGCS1    | 3-hydroxy-3-methylglutaryl-Coenzyme A synthase      | 0,779985102            | 1,34E-013                | 5,78E-011            |
| 3162_at   | HMOX1     | heme oxygenase (decycling) 1                        | 0,8145864              | 2,90E-011                | 6,00E-009            |
| 3304_at   | HSPA1B    | heat shock 70kDa protein 1B                         | 0,665467775            | 2,39E-008                | 1,61E-006            |
| 3371_at   | TNC       | tenascin C                                          | 0,727636826            | 4,70E-014                | 2,45E-011            |
| 340529_at | PABPC1L2A | poly(A) binding protein, cytoplasmic 1-like 2A      | -0,753450827           | 9,70E-005                | 0,001650875          |

Figure S8



d

| Probe     | Symbol    | Description                                                              | logFC G112 CIQ vs untr | P.Value G112 CIQ vs untr | FDR G112 CIQ vs untr |
|-----------|-----------|--------------------------------------------------------------------------|------------------------|--------------------------|----------------------|
| 3417_at   | IDH1      | isocitrate dehydrogenase 1 (NADP), soluble                               | 0,839432429            | 5,34E-012                | 1,45E-009            |
| 347735_at | SERINC2   | serine incorporator 2                                                    | 0,714313465            | 1,74E-011                | 3,79E-009            |
| 3638_at   | INSIG1    | insulin induced gene 1                                                   | 0,906294292            | 3,61E-014                | 2,04E-011            |
| 3782_at   | KCNN3     | potassium intermediate/small conductance calciur                         | -0,589982612           | 8,47E-009                | 6,87E-007            |
| 387758_at | FIBIN     | fin bud initiation factor                                                | 0,594456774            | 3,15E-007                | 1,40E-005            |
| 3934_at   | LCN2      | lipocalin 2                                                              | 0,714444612            | 2,29E-009                | 2,24E-007            |
| 3955_at   | LFNG      | LFNG O-fucosylpeptide 3-beta-N-acetylglucosamir                          | -0,760487235           | 1,14E-011                | 2,75E-009            |
| 401190_at | RGS7BP    | regulator of G-protein signaling 7 binding protein                       | 0,613849867            | 1,03E-007                | 5,55E-006            |
| 4047_at   | LSS       | lanosterol synthase (2,3-oxidosqualene-lanosterol                        | 1,047239054            | 1,74E-016                | 3,44E-013            |
| 4071_at   | TM4SF1    | transmembrane 4 L six family member 1                                    | -0,705102317           | 4,70E-013                | 1,72E-010            |
| 4074_at   | M6PR      | mannose-6-phosphate receptor (cation dependent)                          | 0,594166277            | 1,01E-009                | 1,12E-007            |
| 4323_at   | MMP14     | matrix metalloproteinase 14 (membrane-inserted)                          | 0,740108868            | 1,17E-012                | 3,85E-010            |
| 440015_at | LOC440015 | similar to double homeobox, 4                                            | -0,614689558           | 4,56E-005                | 0,000901033          |
| 467_at    | ATF3      | activating transcription factor 3                                        | 0,596587984            | 6,17E-011                | 1,05E-008            |
| 4688_at   | NCF2      | neutrophil cytosolic factor 2                                            | 0,704383173            | 2,71E-011                | 5,70E-009            |
| 4758_at   | NEU1      | sialidase 1 (lysosomal sialidase)                                        | 1,251878833            | 2,81E-016                | 4,42E-013            |
| 4779_at   | NFE2L1    | nuclear factor (erythroid-derived 2)-like 1                              | 0,749653515            | 1,93E-011                | 4,16E-009            |
| 482_at    | ATP1B2    | ATPase, Na <sup>+</sup> /K <sup>+</sup> transporting, beta 2 polypeptide | -0,64060874            | 9,19E-012                | 2,27E-009            |
| 4856_at   | NOV       | nephroblastoma overexpressed gene                                        | 1,720341681            | 3,97E-020                | 2,62E-016            |
| 4919_at   | ROR1      | receptor tyrosine kinase-like orphan receptor 1                          | 1,02787474             | 7,56E-017                | 2,05E-013            |
| 50650_at  | ARHGEF3   | Rho guanine nucleotide exchange factor (GEF) 3                           | 0,589473809            | 2,72E-009                | 2,61E-007            |
| 5184_at   | PEPD      | peptidase D                                                              | 0,652830475            | 3,31E-011                | 6,63E-009            |
| 5208_at   | PFKFB2    | 6-phosphofructo-2-kinase/fructose-2,6-biphosphata                        | 0,840089563            | 1,18E-011                | 2,77E-009            |
| 5327_at   | PLAT      | plasminogen activator, tissue                                            | -1,878928756           | 1,55E-022                | 1,53E-018            |
| 5337_at   | PLD1      | phospholipase D1, phosphatidylcholine-specific                           | -0,629838907           | 1,16E-011                | 2,76E-009            |
| 54020_at  | SLC37A1   | solute carrier family 37 (glycerol-3-phosphate trans                     | 0,62960635             | 2,35E-009                | 2,29E-007            |
| 54557_at  | SGTB      | small glutamine-rich tetratricopeptide repeat (TPR)                      | 0,891727925            | 1,30E-011                | 3,02E-009            |
| 5476_at   | CTSA      | cathepsin A                                                              | 0,656097847            | 4,25E-013                | 1,62E-010            |
| 54800_at  | KLHL24    | kelch-like 24 (Drosophila)                                               | 1,055183409            | 7,40E-016                | 9,28E-013            |

Figure S8

e

| Probe     | Symbol    | Description                                         | logFC G112 CIQ vs untr | P.Value G112 CIQ vs untr | FDR G112 CIQ vs untr |
|-----------|-----------|-----------------------------------------------------|------------------------|--------------------------|----------------------|
| 54873_at  | PALMD     | palmdelphin                                         | -0,678661644           | 2,58E-010                | 3,68E-008            |
| 54978_at  | C2orf18   | chromosome 2 open reading frame 18                  | 0,608072073            | 4,62E-010                | 6,03E-008            |
| 55062_at  | WIP1      | WD repeat domain, phosphoinositide interacting 1    | 0,937312732            | 2,51E-015                | 2,26E-012            |
| 55117_at  | SLC6A15   | solute carrier family 6, member 15                  | 0,995405311            | 1,69E-015                | 1,68E-012            |
| 55238_at  | SLC38A7   | solute carrier family 38, member 7                  | 0,588952318            | 1,38E-009                | 1,46E-007            |
| 55247_at  | NEIL3     | nei endonuclease VIII-like 3 (E. coli)              | -0,676557924           | 1,34E-010                | 2,13E-008            |
| 55283_at  | MCOLN3    | mucolipin 3                                         | 0,733836575            | 3,44E-011                | 6,75E-009            |
| 55314_at  | TMEM144   | transmembrane protein 144                           | 0,923322253            | 3,17E-013                | 1,26E-010            |
| 55331_at  | PHCA      | phytoceramidase, alkaline                           | -0,959334375           | 2,95E-014                | 1,89E-011            |
| 55740_at  | ENAH      | enabled homolog (Drosophila)                        | -0,616169272           | 6,03E-011                | 1,04E-008            |
| 55902_at  | ACSS2     | acyl-CoA synthetase short-chain family member 2     | 0,60113002             | 1,88E-010                | 2,89E-008            |
| 56180_at  | MOSPD1    | motile sperm domain containing 1                    | 0,610333374            | 8,59E-007                | 3,22E-005            |
| 5660_at   | PSAP      | prosaposin                                          | 0,70985959             | 7,52E-014                | 3,72E-011            |
| 56907_at  | SPIRE1    | spire homolog 1 (Drosophila)                        | 0,899698274            | 5,00E-012                | 1,39E-009            |
| 57016_at  | AKR1B10   | aldo-keto reductase family 1, member B10 (aldose    | -0,61216227            | 0,000299178              | 0,00407079           |
| 57381_at  | RHOJ      | ras homolog gene family, member J                   | -0,814788552           | 2,03E-013                | 8,38E-011            |
| 5803_at   | PTPRZ1    | protein tyrosine phosphatase, receptor-type, Z poly | -1,005565617           | 3,42E-014                | 2,03E-011            |
| 58527_at  | C6orf115  | chromosome 6 open reading frame 115                 | 0,695093156            | 2,54E-008                | 1,68E-006            |
| 58528_at  | RRAGD     | Ras-related GTP binding D                           | 1,018370424            | 4,00E-013                | 1,55E-010            |
| 619190_at | FDPSL2A   | MGC44478                                            | 0,633450062            | 0,001407313              | 0,013270582          |
| 6307_at   | SC4MOL    | sterol-C4-methyl oxidase-like                       | 1,021882824            | 3,20E-012                | 9,45E-010            |
| 6319_at   | SCD       | stearoyl-CoA desaturase (delta-9-desaturase)        | 0,783108932            | 1,69E-011                | 3,72E-009            |
| 6400_at   | SEL1L     | sel-1 suppressor of lin-12-like (C. elegans)        | 0,59677613             | 2,91E-011                | 6,00E-009            |
| 64121_at  | RRAGC     | Ras-related GTP binding C                           | 0,913394009            | 4,49E-015                | 3,68E-012            |
| 643246_at | MAP1LC3B2 | microtubule-associated protein 1 light chain 3 beta | 0,771138821            | 3,70E-008                | 2,30E-006            |
| 643428_at | LOC643428 | hypothetical LOC643428                              | -0,837154249           | 2,37E-009                | 2,30E-007            |
| 6713_at   | SQLE      | squalene epoxidase                                  | 0,600081966            | 3,55E-011                | 6,75E-009            |
| 677798_at | SNORA9    | small nucleolar RNA, H/ACA box 9                    | -0,629362387           | 3,73E-007                | 1,61E-005            |
| 6809_at   | STX3      | syntaxin 3                                          | 0,746918644            | 2,82E-010                | 3,98E-008            |
| 7042_at   | TGFB2     | transforming growth factor, beta 2                  | -0,912082592           | 9,73E-012                | 2,38E-009            |

Figure S8

| Probe    | Symbol  | Description                                          | logFC G112 CIQ vs untr | P.Value G112 CIQ vs untr | FDR G112 CIQ vs untr |
|----------|---------|------------------------------------------------------|------------------------|--------------------------|----------------------|
| 7048_at  | TGFBR2  | transforming growth factor, beta receptor II (70/80k | -0,585236778           | 1,34E-008                | 1,01E-006            |
| 7153_at  | TOP2A   | topoisomerase (DNA) II alpha 170kDa                  | -0,684794439           | 5,65E-011                | 1,01E-008            |
| 7316_at  | UBC     | ubiquitin C                                          | 0,671691587            | 2,02E-007                | 9,57E-006            |
| 7447_at  | VSNL1   | visinin-like 1                                       | -0,586901243           | 1,03E-008                | 8,19E-007            |
| 7453_at  | WARS    | tryptophanyl-tRNA synthetase                         | 0,859124567            | 4,05E-014                | 2,23E-011            |
| 79993_at | ELOVL7  | ELOVL family member 7, elongation of long chain      | 0,666645437            | 5,81E-010                | 7,32E-008            |
| 80727_at | TTYH3   | tweety homolog 3 (Drosophila)                        | -0,753878291           | 1,25E-012                | 4,04E-010            |
| 80818_at | ZNF436  | zinc finger protein 436                              | -0,585473329           | 3,08E-010                | 4,27E-008            |
| 8165_at  | AKAP1   | A kinase (PRKA) anchor protein 1                     | 0,708730661            | 5,92E-011                | 1,03E-008            |
| 81848_at | SPRY4   | sprouty homolog 4 (Drosophila)                       | -0,832261845           | 1,31E-012                | 4,19E-010            |
| 8404_at  | SPARCL1 | SPARC-like 1 (hevin)                                 | -0,680409093           | 4,33E-012                | 1,25E-009            |
| 84418_at | C5orf32 | chromosome 5 open reading frame 32                   | 0,669768449            | 1,55E-011                | 3,49E-009            |
| 84707_at | BEX2    | brain expressed X-linked 2                           | 0,628822422            | 1,65E-008                | 1,19E-006            |
| 8507_at  | ENC1    | ectodermal-neural cortex (with BTB-like domain)      | -0,690003395           | 9,62E-009                | 7,71E-007            |
| 8553_at  | BHLHB2  | basic helix-loop-helix domain containing, class B,   | 0,689247115            | 3,50E-011                | 6,75E-009            |
| 8878_at  | SQSTM1  | sequestosome 1                                       | 0,788821893            | 5,42E-013                | 1,95E-010            |
| 891_at   | CCNB1   | cyclin B1                                            | -0,595714279           | 1,81E-008                | 1,28E-006            |
| 8934_at  | RAB7L1  | RAB7, member RAS oncogene family-like 1              | 0,620423852            | 5,95E-010                | 7,45E-008            |
| 8974_at  | P4HA2   | procollagen-proline, 2-oxoglutarate 4-dioxygenase    | 0,604547489            | 2,17E-010                | 3,24E-008            |
| 90293_at | KLHL13  | kelch-like 13 (Drosophila)                           | -0,906506831           | 4,91E-016                | 6,94E-013            |
| 91373_at | UAP1L1  | UDP-N-acteylglucosamine pyrophosphorylase 1-li       | 0,683352585            | 9,01E-012                | 2,26E-009            |
| 91445_at | RNF185  | ring finger protein 185                              | 0,669045048            | 1,88E-008                | 1,33E-006            |
| 9156_at  | EXO1    | exonuclease 1                                        | -0,60152734            | 7,03E-012                | 1,85E-009            |
| 9388_at  | LIPG    | lipase, endothelial                                  | 0,962640368            | 4,51E-013                | 1,69E-010            |
| 9493_at  | KIF23   | kinesin family member 23                             | -0,599425603           | 1,11E-009                | 1,21E-007            |
| 9518_at  | GDF15   | growth differentiation factor 15                     | 0,893113226            | 1,50E-011                | 3,41E-009            |
| 953_at   | ENTPD1  | ectonucleoside triphosphate diphosphohydrolase 1     | 0,690533221            | 1,08E-010                | 1,74E-008            |
| 96459_at | FNIP1   | folliculin interacting protein 1                     | 0,917727705            | 4,46E-015                | 3,68E-012            |
| 9709_at  | HERPUD1 | homocysteine-inducible, endoplasmic reticulum st     | 0,715931664            | 7,09E-012                | 1,85E-009            |
| 9787_at  | DLGAP5  | discs, large (Drosophila) homolog-associated prote   | -0,627158451           | 2,95E-010                | 4,13E-008            |
| 9890_at  | LPPR4   | plasticity related gene 1                            | 0,987214069            | 7,50E-016                | 9,28E-013            |

Figure S8

## CIQ\_DEGs\_#1095 (p53 null)

| Probe     | Symbol   | Description   | logFC #1095_CIQ vs untreated | P-Value #1095_CIQ vs untreated | FDR #1095_CIQ vs untreated |
|-----------|----------|---------------|------------------------------|--------------------------------|----------------------------|
| 10457_at  | GPNMB    | glycoprotein  | 3,34                         | 2,10E-16                       | 0,00%                      |
| 3488_at   | IGFBP5   | insulin-like  | -2,34                        | 2,37E-14                       | 0,00%                      |
| 2170_at   | FABP3    | fatty acid b  | 2,19                         | 1,84E-13                       | 0,00%                      |
| 8869_at   | ST3GAL5  | ST3 beta-g    | 1,92                         | 1,30E-14                       | 0,00%                      |
| 5046_at   | PCSK6    | proprotein    | 1,55                         | 5,60E-12                       | 0,00%                      |
| 3397_at   | ID1      | inhibitor of  | -1,53                        | 2,31E-10                       | 0,00%                      |
| 51050_at  | PI15     | peptidase     | 1,44                         | 3,01E-09                       | 0,00%                      |
| 115265_at | DDIT4L   | DNA-dama      | 1,32                         | 1,33E-10                       | 0,00%                      |
| 9518_at   | GDF15    | growth diffe  | 1,30                         | 1,73E-12                       | 0,00%                      |
| 79365_at  | BHLHE41  | basic helix   | 1,29                         | 7,11E-13                       | 0,00%                      |
| 1410_at   | CRYAB    | crystallin, c | 1,28                         | 2,27E-12                       | 0,00%                      |
| 9411_at   | ARHGAP2  | Rho GTPase    | -1,27                        | 7,12E-11                       | 0,00%                      |
| 5208_at   | PFKFB2   | 6-phospho     | 1,27                         | 6,31E-11                       | 0,00%                      |
| 256987_at | SERINC5  | serine inco   | 1,26                         | 2,97E-12                       | 0,00%                      |
| 344148_at | NCKAP5   | NCK-asso      | 1,22                         | 1,50E-07                       | 0,00%                      |
| 7128_at   | TNFAIP3  | tumor necr    | -1,19                        | 1,80E-11                       | 0,00%                      |
| 23305_at  | ACSL6    | acyl-CoA s    | 1,17                         | 1,07E-09                       | 0,00%                      |
| 64122_at  | FN3K     | fructosami    | 1,16                         | 8,78E-09                       | 0,00%                      |
| 119548_at | PNLIPRP3 | pancreatic    | 1,12                         | 8,40E-08                       | 0,00%                      |
| 28526_at  | TRDC     | T cell rece   | -1,11                        | 1,12E-08                       | 0,00%                      |
| 3399_at   | ID3      | inhibitor of  | -1,06                        | 2,02E-10                       | 0,00%                      |
| 127495_at | LRRRC39  | leucine ric   | 1,03                         | 8,81E-09                       | 0,00%                      |
| 3675_at   | ITGA3    | integrin, al  | -1,02                        | 5,90E-11                       | 0,00%                      |
| 9388_at   | LIPG     | lipase, enc   | 1,01                         | 7,90E-09                       | 0,00%                      |

**Figure S9**



# AAH-APOCIG-1 ARRAY

| Each antibody is spotted in duplicate vertically |   | A                                   | B                 | C                        | D                     | E                           | F                  | G                             | H                             |
|--------------------------------------------------|---|-------------------------------------|-------------------|--------------------------|-----------------------|-----------------------------|--------------------|-------------------------------|-------------------------------|
|                                                  | 1 | POS                                 | POS               | NEG                      | Akt<br>(P-Ser473)     | ATM<br>(P-Ser1981)          | BAD<br>(P-Ser112)  | Caspase-3<br>(Cleaved Asp175) | Caspase-7<br>(Cleaved Asp198) |
|                                                  | 2 |                                     |                   |                          |                       |                             |                    |                               |                               |
|                                                  | 3 | CHK1<br>(P-Ser296)                  | CHK2<br>(P-Thr68) | eIF-2a<br>(P-Ser51)      | ERK1<br>(P-T202/Y204) | HSP27<br>(P-Ser82)          | IKBa<br>(P-Ser32)  | JNK<br>(P-Thr183/Tyr185)      | NFKBP65<br>(P-Ser536)         |
|                                                  | 4 |                                     |                   |                          | ERK2<br>(P-Y185/Y187) |                             |                    |                               |                               |
|                                                  | 5 | PARP1<br>(Cleaved<br>Asp214/Gly215) | p27<br>(P-Thr198) | P38<br>(P-Thr180/Tyr182) | P53<br>(P-Ser15)      | SMAD2<br>(P-Ser245/250/255) | TAK1<br>(P-Ser412) | NEG                           | POS                           |
|                                                  | 6 |                                     |                   |                          |                       |                             |                    |                               |                               |

Figure S10

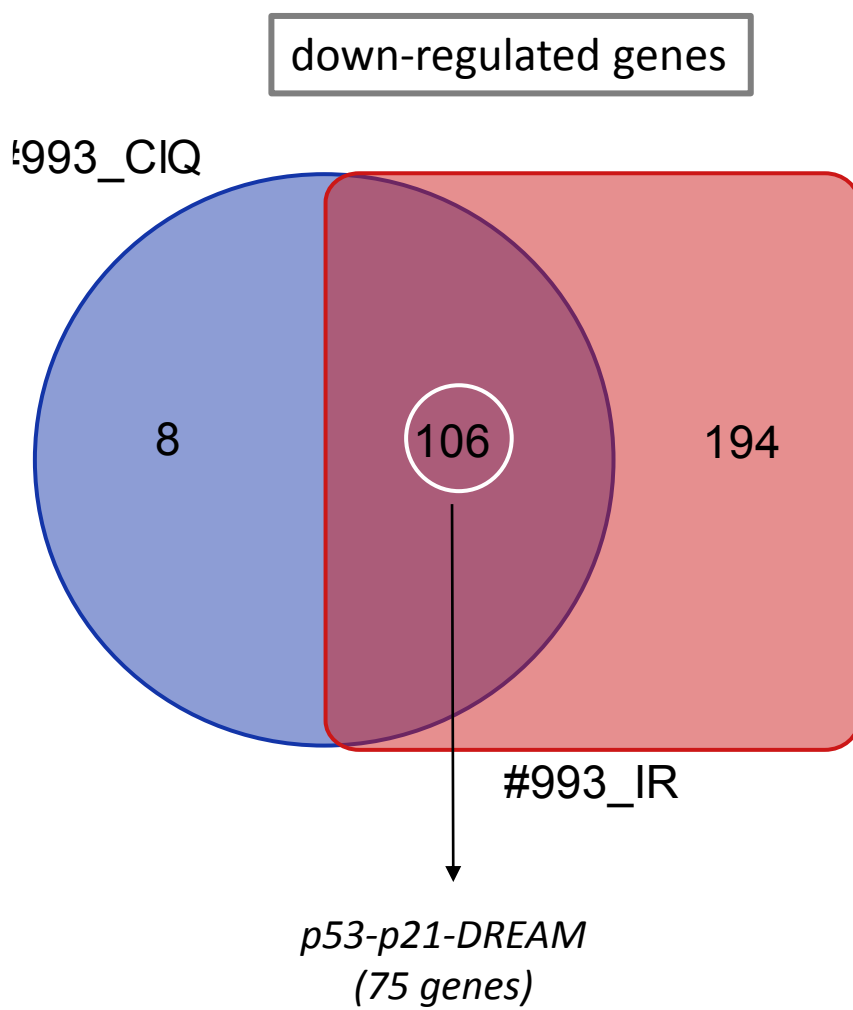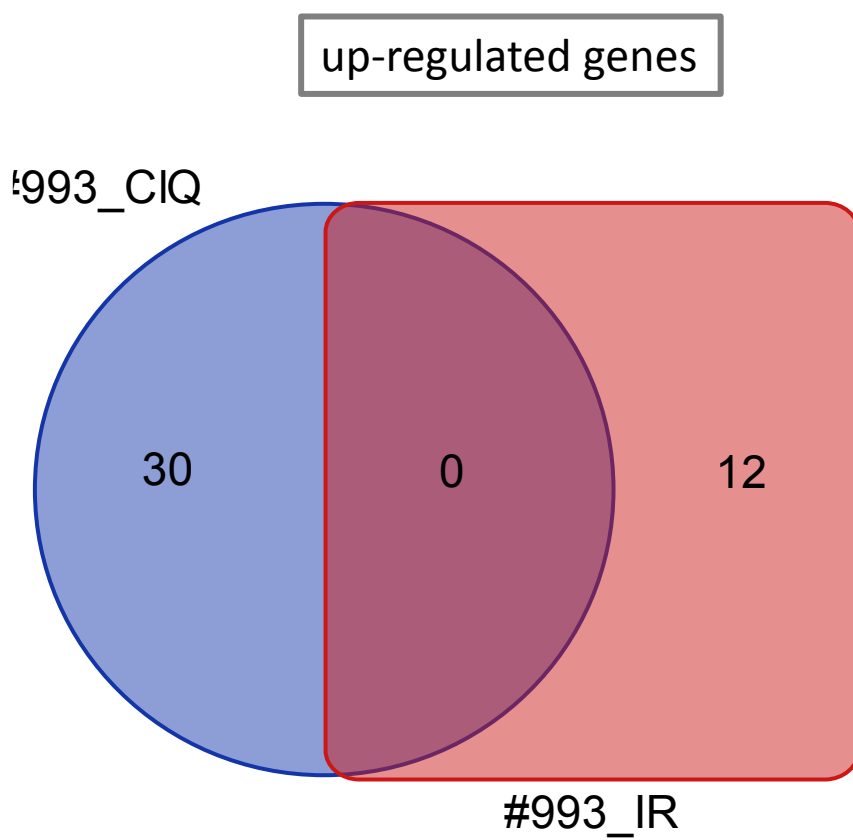

**Figure S11**

Figure 12 rev

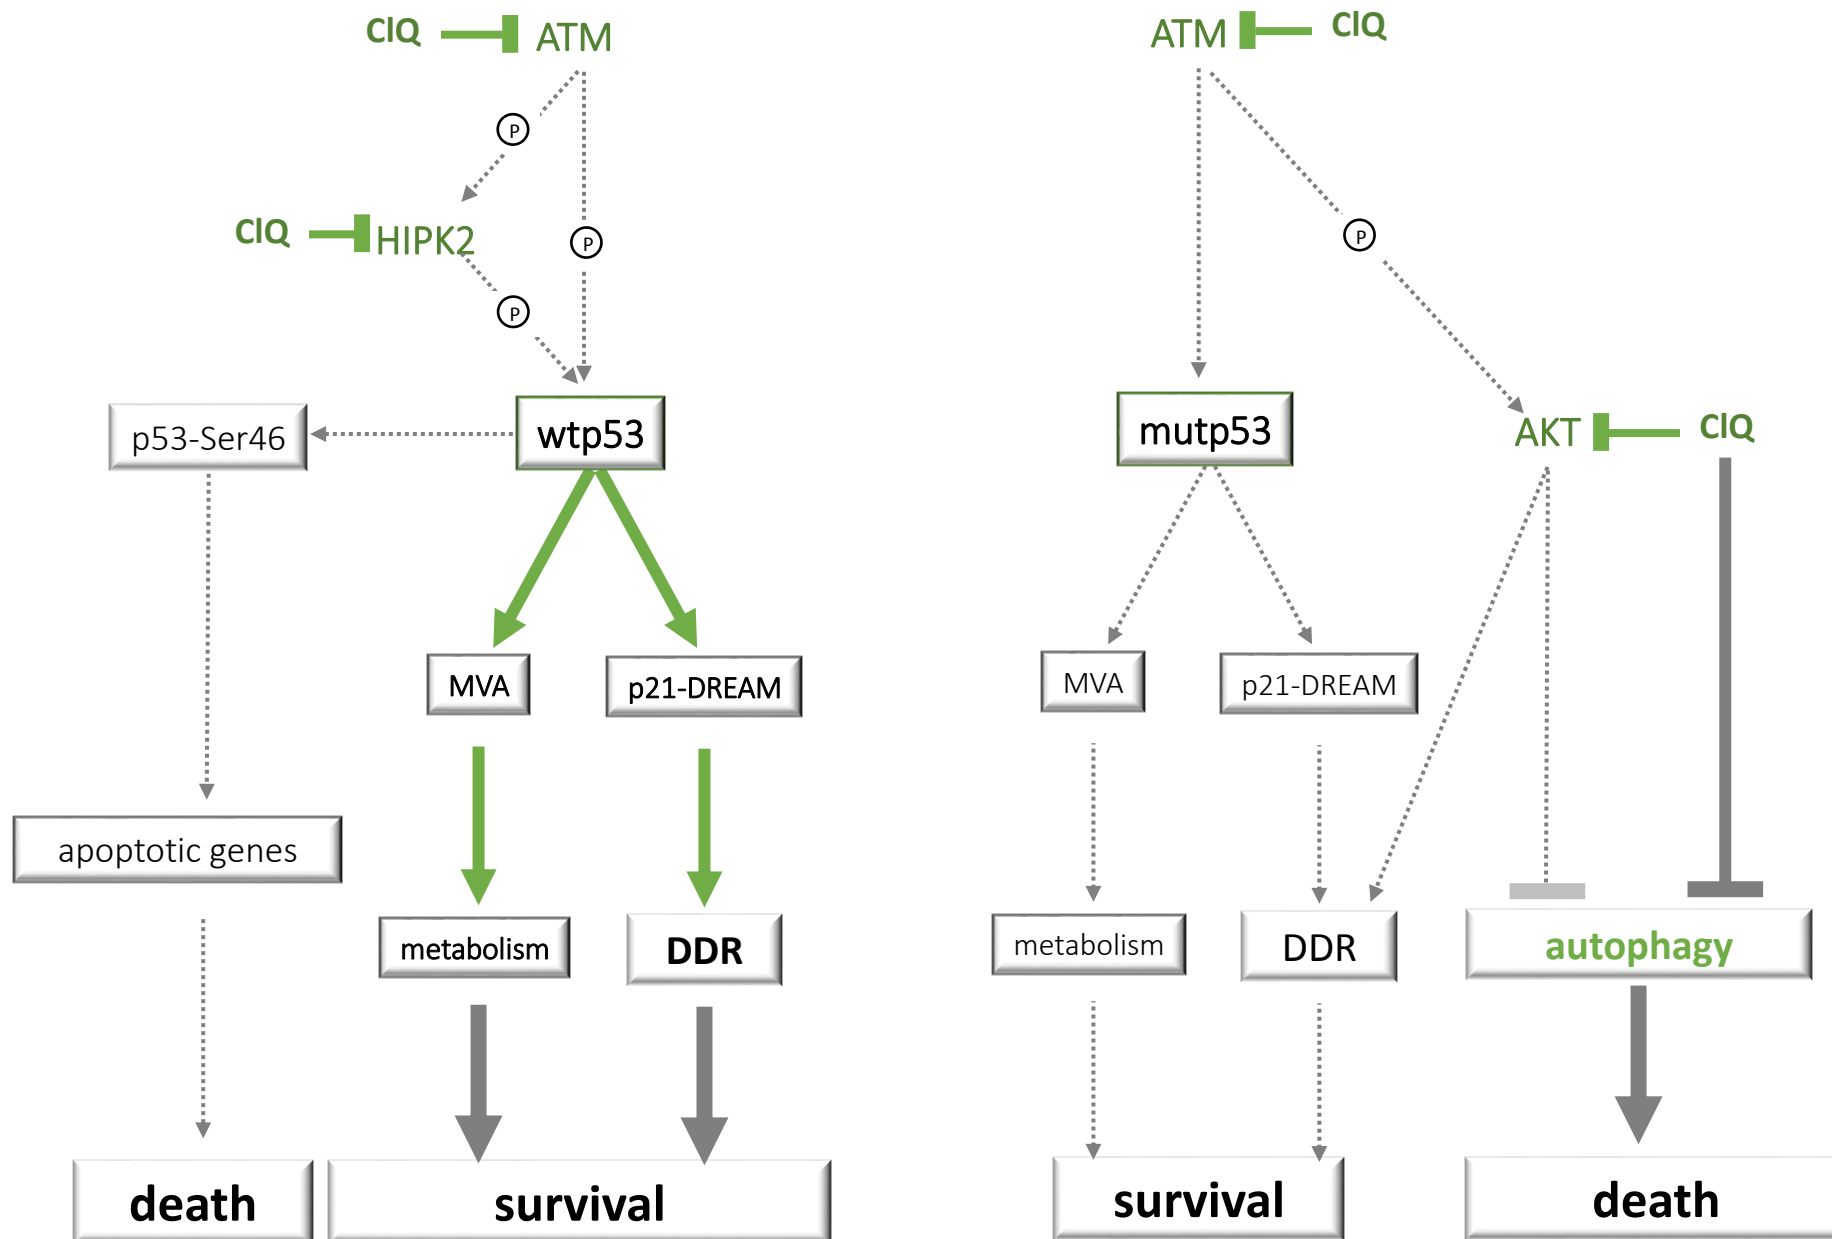

**Table S1****a)**

| <b>up-regulated CIQ_DEGs</b> |                                    |                       |
|------------------------------|------------------------------------|-----------------------|
| <b>Gene</b>                  | <b>Function in GB</b>              | <b>Reference</b>      |
| <i>acsl6</i>                 | associated with therapy resistance | Zhuo et al. (89)      |
| <i>cryab</i>                 | associated with therapy resistance | Goplen et al. (90)    |
| <i>ddit4l</i>                | associated with therapy resistance | Foltyn et al. (91)    |
| <i>fabp3</i>                 | associated with stemness           | Lewis et al. (92)     |
| <i>gdf15</i>                 | associated with poor prognosis     | Guo et al. (93)       |
| <i>gpnmb</i>                 | associated with stemness           | Feng et al. (94)      |
| <i>nckap5</i>                | associated with poor prognosis     | Akçay et al. (95)     |
| <i>pcsk6</i>                 | associated with invasion           | Delic et al. (96)     |
| <i>pfkfb2</i>                | associated with invasion           | He et al. (97)        |
| <i>st3gal5</i>               | associated with stemness           | Putthisen et al. (98) |

**b)**

| <b>down-regulated CIQ_DEGs</b> |                                              |                         |
|--------------------------------|----------------------------------------------|-------------------------|
| <b>Gene</b>                    | <b>Function in GB</b>                        | <b>Reference</b>        |
| <i>arhgap29</i>                | associated with invasion                     | Mariani et al. (99)     |
| <i>id1</i>                     | associated with chemoresistance              | Sachdeva et al. (100)   |
| <i>id3</i>                     | promotes stemness                            | Nair et al. (101)       |
| <i>Igfbp5</i>                  | promotes invasion but inhibits proliferation | Dong et al. (102)       |
| <i>Itga3</i>                   | promotes radioresistance                     | Serafim et al. (103)    |
| <i>tnfaip3</i>                 | promotes GSCs survival and tumorigenicity    | Hjelmeland et al. (104) |

## References

89. Zhuo, S.; Chen, Z.; Yang, Y.; Zhang, J.; Tang, J.; Yang, K. Clinical and Biological Significances of a Ferroptosis-Related Gene Signature in Glioma. *Front Oncol* 2020, 10, 590861. DOI: 10.3389/fonc.2020.590861
90. Goplen, D.; Bougnaud, S.; Rajcevic, U.; Bøe, S. O.; Skafnesmo, K. O.; Voges, J.; Enger, P.; Wang, J.; Tysnes, B. B.; Laerum, O. D.; et al.  $\alpha$ B-crystallin is elevated in highly infiltrative apoptosis-resistant glioblastoma cells. *Am J Pathol* 2010, 177 (4), 1618-1628. DOI: 10.2353/ajpath.2010.090063
91. Foltyn, M.; Luger, A.-L.; Lorenz, N. I.; Sauer, B.; Mittelbronn, M.; Harter, P. N.; Steinbach, J. P.; Ronellenfitsch, M. W. The physiological mTOR complex 1 inhibitor DDIT4 mediates therapy resistance in glioblastoma. *Br J Cancer* 2019, 120 (5), 481-487. DOI: 10.1038/s41416-018-0368-3.
92. Lewis, C. A.; Brault, C.; Peck, B.; Bensaad, K.; Griffiths, B.; Mitter, R.; Chakravarty, P.; East, P.; Dankworth, B.; Alibhai, D.; et al. SREBP maintains lipid biosynthesis and viability of cancer cells under lipid- and oxygen-deprived conditions and defines a gene signature associated with poor survival in glioblastoma multiforme. *Oncogene* 2015, 34 (40), 5128-5140. DOI: 10.1038/onc.2014.439
93. Guo, L.; Chen, Y.; Hu, S.; Gao, L.; Tang, N.; Liu, R.; Qin, Y.; Ren, C.; Du, S. GDF15 expression in glioma is associated with malignant progression, immune microenvironment, and serves as a prognostic factor. *CNS Neurosci Ther* 2022, 28 (1), 158-171. DOI: 10.1111/cns.13749
94. Feng, X.; Zhang, L.; Ke, S.; Liu, T.; Hao, L.; Zhao, P.; Tu, W.; Cang, S. High expression of GPNMB indicates an unfavorable prognosis in glioma: Combination of data from the GEO and CGGA databases and validation in tissue microarray. *Oncol Lett* 2020, 20 (3), 2356-2368. DOI: 10.3892/ol.2020.11787
95. Akçay, S.; Güven, E.; Afzal, M.; Kazmi, I. Non-negative matrix factorization and differential expression analyses identify hub genes linked to progression and prognosis of glioblastoma multiforme. *Gene* 2022, 824, 146395. DOI: 10.1016/j.gene.2022.146395
96. Delic, S.; Lottmann, N.; Jetschke, K.; Reifenberger, G.; Riemenschneider, M. J. Identification and functional validation of CDH11, PCSK6 and SH3GL3 as novel glioma invasion-associated candidate genes. *Neuropathol Appl Neurobiol* 2012, 38 (2), 201-212. DOI: 10.1111/j.1365-2990.2011.01207.x
97. He, Z.; You, C.; Zhao, D. Long non-coding RNA UCA1/miR-182/PFKFB2 axis modulates glioblastoma-associated stromal cells-mediated glycolysis and invasion of glioma cells. *Biochem Biophys Res Commun* 2018, 500 (3), 569-576. DOI: 10.1016/j.bbrc.2018.04.091
98. Putthisen, S.; Silsirivanit, A.; Panawan, O.; Niibori-Nambu, A.; Nishiyama-Ikeda, Y.; Ma-In, P.; Luang, S.; Ohta, K.; Muisuk, K.; Wongkham, S.; et al. Targeting  $\alpha$ 2,3-sialylated glycan in glioma stem-like cells by Maackia amurensis lectin-II: A promising strategy for glioma treatment. *Exp Cell Res* 2022, 410 (1), 112949. DOI: <https://doi.org/10.1016/j.yexcr.2021.112949>.
99. Mariani, L.; Beaudry, C.; McDonough, W. S.; Hoelzinger, D. B.; Demuth, T.; Ross, K. R.; Berens, T.; Coons, S. W.; Watts, G.; Trent, J. M.; et al. Glioma Cell Motility is Associated with Reduced Transcription of Proapoptotic and Proliferation Genes: A cDNA Microarray Analysis. *J Neurooncol* 2001, 53 (2), 161-176. DOI: 10.1023/A:1012253317934.
100. Sachdeva, R.; Wu, M.; Smiljanic, S.; Kaskun, O.; Ghannad-Zadeh, K.; Celebre, A.; Isaev, K.; Morrissy, A. S.; Guan, J.; Tong, J.; et al. ID1 Is Critical for Tumorigenesis and Regulates Chemoresistance in Glioblastoma. *Cancer Res* 2019, 79 (16), 4057-4071. DOI: 10.1158/0008-5472.can-18-1357
101. Nair, R.; Teo, W. S.; Mittal, V.; Swarbrick, A. ID proteins regulate diverse aspects of cancer progression and provide novel therapeutic opportunities. *Mol Ther* 2014, 22 (8), 1407-1415. DOI: 10.1038/mt.2014.83
102. Dong, C.; Zhang, J.; Fang, S.; Liu, F. IGFBP5 increases cell invasion and inhibits cell proliferation by EMT and Akt signaling pathway in Glioblastoma multiforme cells. *Cell Div* 2020, 15, 4. DOI: 10.1186/s13008-020-00061-6
103. Serafim, R. B.; da Silva, P.; Cardoso, C.; Di Cristofaro, L. F. M.; Netto, R. P.; de Almeida, R.; Navegante, G.; Storti, C. B.; de Sousa, J. F.; de Souza, F. C.; et al. Expression Profiling of Glioblastoma Cell Lines Reveals Novel Extracellular Matrix-Receptor Genes Correlated With the Responsiveness of Glioma Patients to Ionizing Radiation. *Front Oncol* 2021, 11, Original Research. DOI: 10.3389/fonc.2021.668090.
104. Hjelmeland, A. B.; Wu, Q.; Wickman, S.; Eyler, C.; Heddleston, J.; Shi, Q.; Lathia, J. D.; Macswords, J.; Lee, J.; McLendon, R. E.; et al. Targeting A20 decreases glioma stem cell survival and tumor growth. *PLoS Biol* 2010, 8 (2), e1000319. DOI: 10.1371/journal.pbio.1000319
